# Supplementary material
Source: publisher figshare collection journal article supplement (https://acs.figshare.com/ndownloader/files/3810466)
Supplement: Supplementary file 1 [file 3810466]

## Supporting Information

### Development of a series of near-infrared dark quenchers based on Si-rhodamines and their application to fluorescent probes

Takuya Myochin<sup>†</sup>, Kenjiro Hanaoka<sup>\*,†</sup>, Shimpei Iwaki<sup>†</sup>, Tasuku Ueno<sup>†</sup>, Toru, Komatsu<sup>†,¶</sup>, Takuya Terai<sup>†</sup>,  
Tetsuo Nagano<sup>‡</sup>, and Yasuteru Urano<sup>\*,†,§,⊥</sup>

<sup>†</sup> Graduate School of Pharmaceutical Sciences, The University of Tokyo, Tokyo 113-0033, Japan.

<sup>‡</sup> Open Innovation Center for Drug Discovery, The University of Tokyo, Tokyo 113-0033, Japan.

<sup>§</sup> Graduate School of Medicine, The University of Tokyo, Tokyo 113-0033, Japan

<sup>¶</sup> Precursory Research for Embryonic Science and Technology (PREST), Japan Science and Technology Agency (JST), Saitama 332-0012, Japan

<sup>⊥</sup> CREST, Japan Science and Technology Agency (JST), Saitama 332-0012, Japan

\* Correspondence should be addressed to Y.U. (E-mail): uranokun@m.u-tokyo.ac.jp; (tel) +81-3-5841-4850; (fax) +81-3-5841-4855; K.H. (E-mail): khanaoka@mol.f.u-tokyo.ac.jp; (tel) +81-3-5841-4852; (fax) +81-3-5841-4855.

**Abbreviations:**

AcOEt: ethyl acetate

AcOH: acetic acid

Ac<sub>2</sub>O: acetic anhydride

DCM: dichloromethane

DIEA: *N,N*-diisopropylethylamine

DMEM: Dulbecco's modified Eagle's medium

DMF: *N,N*-dimethylformamide

DMSO: dimethyl sulfoxide

EMEM: Eagle's minimal essential medium

ESI: electrospray ionization

EtOH: ethanol

Φ<sub>fl</sub>: fluorescence quantum yield

FBS: fetal bovine serum

HATU: 2-(1*H*-7-azabenzotriazol-1-yl)-1,1,3,3-tetramethyluronium hexafluorophosphate methanaminium

HBSS: Hanks' balanced salt solution

HBTU: *O*-benzotriazole-*N,N,N',N'*-tetramethyluronium hexafluorophosphate

HOBt: 1-hydroxybenzotriazole

HPLC: high-performance liquid chromatography

HRMS: high-resolution mass spectrometry

MeOH: methanol

MMP: matrix metalloproteinase

MS: mass spectrometry

NHS: *N*-hydroxysuccinimide

NMR: nuclear magnetic resonance

ODS: octadecylsilane

PBS: phosphate-buffered saline

r.t.: room temperature

TEA: triethylamine

TFA: trifluoroacetic acid

THF: tetrahydrofuran

WSCD: water-soluble carbodiimide

## Experimental Section

### Synthesis.

#### 3,6-Diamino-Si-xanthone (2)

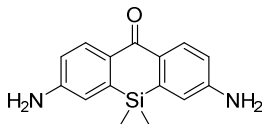

Prepared according to the literature.<sup>SR1</sup>

#### 3,6-Diiodo-Si-xanthone (3)

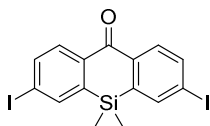

Compound **2** (228 mg, 0.85 mmol) was dissolved in a mixture of 5 mL CH<sub>3</sub>CN and 10 mL 2 N HCl aq., and the solution was cooled to 0°C. A solution of NaNO<sub>2</sub> (140 mg, 1.70 mmol) in 2 mL H<sub>2</sub>O was added dropwise, and the mixture was stirred for 15 min. KI (2.82 g, 8.50 mmol) in 2 mL H<sub>2</sub>O was added, and stirring was continued for 1 hr. Then 20 mL H<sub>2</sub>O was added, and the whole was extracted with CH<sub>2</sub>Cl<sub>2</sub>. The organic layer was dried over Na<sub>2</sub>SO<sub>4</sub> and evaporated to dryness. Purification of the residue by column chromatography (silica gel, CH<sub>2</sub>Cl<sub>2</sub>) provided **3** (72 mg, 17% yield). <sup>1</sup>H NMR (300 MHz, CDCl<sub>3</sub>): δ 0.51 (s, 6H), 7.92 (dd, *J* = 8.10 Hz, *J* = 1.5 Hz, 2H), 7.98 (d, *J* = 1.5 Hz, 2H), 8.09 (d, *J* = 8.1 Hz, 2H); <sup>13</sup>C NMR (75 MHz, DMSO): δ -1.7, 101.8, 131.8, 131.4, 139.5, 139.5, 140.9, 141.8, 187; HRMS (ESI<sup>+</sup>): Calcd for [M+H]<sup>+</sup>, 490.8825; found, 490.8835 (+1.0 mmu).

#### 3,6-Bis(*N*-methyl-*p*-anisidine)-Si-xanthone (4)

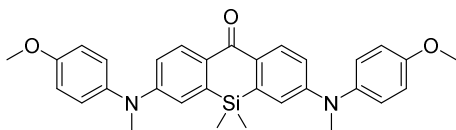

Compound **3** (60 mg, 0.12 mmol), Cs<sub>2</sub>CO<sub>3</sub> (557 mg, 1.70 mmol) and *N*-methylanisidine (131 mg, 0.96 mmol) were dissolved in toluene in a 50 mL Schlenk flask, and the mixture was deaerated under argon. Pd(OAc)<sub>2</sub> (5.2 mg, 0.02 mmol) and BINAP (14.8 mg, 0.02 mmol) were added under argon. The mixture was heated to 100°C and stirred overnight. Then, it was cooled to r.t. and H<sub>2</sub>O was added. The whole was

extracted with CH<sub>2</sub>Cl<sub>2</sub>. The organic layer was dried over Na<sub>2</sub>SO<sub>4</sub> and evaporated to dryness. Purification of the residue by column chromatography (silica gel, CH<sub>2</sub>Cl<sub>2</sub>) provided **4** (12 mg, 20% yield). <sup>1</sup>H NMR (300 MHz, CDCl<sub>3</sub>): δ 0.36 (s, 6H), 3.36 (s, 6H), 3.84 (s, 6H), 6.77-6.83 (m, 4H), 6.95 (d, *J* = 8.7 Hz, 4H), 7.17 (d, *J* = 8.7 Hz, 4H), 8.30 (d, *J* = 9.0 Hz, 2H); <sup>13</sup>C NMR (75 MHz, CDCl<sub>3</sub>): δ -1.3, 40.3, 55.5, 115.0, 115.1, 115.9, 127.8, 130.6, 131.2, 140.3, 151.0, 157.4, 185.1; HRMS (ESI<sup>+</sup>): Calcd for [M+H]<sup>+</sup>, 509.2260; found, 509.2216 (-4.4 mmu).

#### SiNQ660 (**5**)

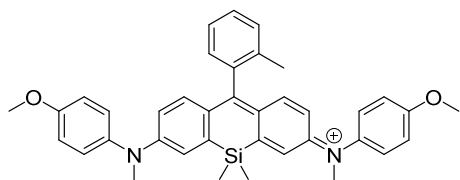

To a flame-dried flask flushed with argon, **4** (12 mg, 0.02 mmol) and anhydrous THF (5 mL) were added. The solution was heated to 80°C, and 1 M *o*-tolyl magnesium bromide (120 μL, 0.12 mmol) was added to it. The mixture was stirred for 2 hrs and cooled to r.t. The reaction was quenched by addition of 2 N HCl and stirring was continued at r.t. for 15 min. The whole was extracted with CH<sub>2</sub>Cl<sub>2</sub>, and the organic layer was dried over Na<sub>2</sub>SO<sub>4</sub> and evaporated to dryness. Purification of the residue by HPLC (eluent, a 20-min linear gradient, from 20% to 100% solvent B; flow rate, 5.0 ml/min; detection wavelength, 640 nm; eluent A (H<sub>2</sub>O containing 0.1% TFA (v/v)) and eluent B (CH<sub>3</sub>CN with 20% H<sub>2</sub>O containing 0.1% TFA (v/v))) provided SiNQ650 (**5**) trifluoroacetic salt (13 mg, 93% yield). <sup>1</sup>H NMR (300 MHz, CDCl<sub>3</sub>): δ 0.49 (s, 3H), 0.51 (s, 3H), 2.03 (s, 3H), 3.61 (s, 6H), 3.86 (s, 6H), 6.50 (dd, *J* = 2.1, 9.0 Hz, 2H), 6.99-7.06 (m, 7H), 7.06-7.18 (m, 6H), 7.27-7.37 (m, 3H); HRMS (ESI<sup>+</sup>): Calcd for [M]<sup>+</sup>, 583.2781; found, 583.2740 (-4.1 mmu). The HPLC chromatogram after purification is shown below. Elution was done with a 20-min linear gradient from 20% to 80% solvent B. 1.0 ml/min flow rate. Detection at 640 nm.

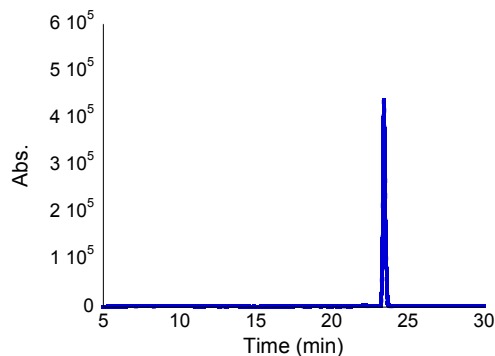

### 3,6-Diindoline-Si-xanthone (6)

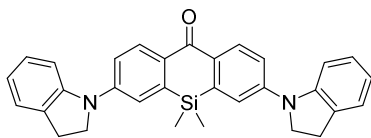

Compound **3** (60 mg, 0.12 mmol), Cs<sub>2</sub>CO<sub>3</sub> (78 mg, 0.24 mmol) and indoline (28 mg, 0.24 mmol) were dissolved in toluene in a 50 mL Schlenk flask, and the mixture was deaerated under argon. Pd(OAc)<sub>2</sub> (2.6 mg, 0.01 mmol) and BINAP (7.4 mg, 0.01 mmol) were added to the solution under argon. The mixture was heated to 100°C and stirred overnight. The solution was cooled to r.t. and H<sub>2</sub>O was added to it. The whole was extracted with CH<sub>2</sub>Cl<sub>2</sub>, and the organic layer was dried over Na<sub>2</sub>SO<sub>4</sub> and evaporated to dryness. Purification of the residue by column chromatography (silica gel, CH<sub>2</sub>Cl<sub>2</sub>/ hexane = 8/2) provided **6** (31 mg, 54% yield). <sup>1</sup>H NMR (300 MHz, CDCl<sub>3</sub>): δ 0.52 (s, 6H), 3.20 (t, *J* = 8.1 Hz, 4H), 4.10 (t, *J* = 8.1 Hz, 4H), 6.86 (t, *J* = 7.5 Hz, 2H), 7.16 (t, *J* = 7.5 Hz, 2H), 7.23 (d, *J* = 7.2 Hz, 2H), 7.31-7.37 (m, 4H), 7.42 (d, *J* = 3.0 Hz, 2H), 8.47 (d, *J* = 9.0 Hz, 2H); <sup>13</sup>C NMR (75 MHz, DMSO): δ -1.20, 28.1, 51.8, 109.6, 117.6, 119.1, 120.3, 125.4, 127.2, 131.5, 132.1, 133.0, 140.4, 145.4, 146.3; HRMS (ESI<sup>+</sup>): Calcd for [M+H]<sup>+</sup>, 473.2049; found, 473.2007 (-4.2 mmu).

### SiNQ780 (7)

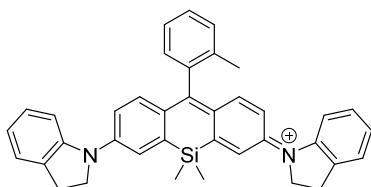

To a flame-dried flask flushed with argon, **6** (44 mg, 0.09 mmol) and anhydrous THF (5 mL) were added. The solution was heated to 80°C, and 1 M *o*-tolyl magnesium bromide (1 mL) was added to it. The mixture was stirred for 2 hrs and cooled to r.t. The reaction was quenched by addition of 2 N HCl and stirring was continued at r.t. for 15 min. The whole was extracted with CH<sub>2</sub>Cl<sub>2</sub>, and the organic layer was dried over Na<sub>2</sub>SO<sub>4</sub> and evaporated to dryness. Purification of the residue by HPLC (eluent, a 20-min linear gradient, from 60% to 100% solvent B; flow rate, 5.0 ml/min; detection wavelength, 720 nm; eluent A (H<sub>2</sub>O containing 0.1% TFA (v/v)) and eluent B (CH<sub>3</sub>CN with 20% H<sub>2</sub>O containing 0.1% TFA (v/v))) provided SiNQ780 (**7**) trifluoroacetic salt (15 mg, 25% yield). <sup>1</sup>H NMR (300 MHz, CD<sub>3</sub>CN): δ 0.65 (s, 6H), 2.16 (s, 3H), 3.26 (t, *J* = 8.1 Hz, 4H), 4.32 (t, *J* = 8.1 Hz, 4H), 7.12-7.49 (m, 16H), 7.57(d, *J* = 8.1 Hz, 2H), 7.72 (d, *J* = 2.4 Hz, 2H); <sup>13</sup>C NMR (75 MHz, CDCl<sub>3</sub>): δ -1.5, -1.1, 19.5, 28.2, 53.1, 114.5, 117.2, 124.0, 125.6, 126.4, 127.8, 128.9, 129.2, 130.4, 130.5, 135.5, 135.7, 138.1, 141.7, 142.0, 148.8, 149.5; HRMS (ESI<sup>+</sup>): Calcd for [M]<sup>+</sup>, 547.2570; found, 547.2536 (-3.4 mmu). The HPLC chromatogram after purification is shown below.

Elution was done with a 20-min linear gradient from 80% to 100% solvent B.1.0 ml/min flow rate. Detection at 720 nm.

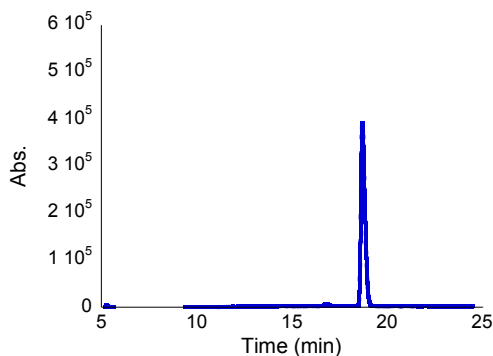

### 1-Allyl-6-bromoindole (**8**)

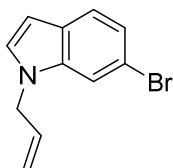

6-Bromoindoline (3.25 g, 16.8 mmol) was dissolved in DMF (20 mL), and the solution was cooled to  $0^\circ\text{C}$ . NaH (737 mg, 20.2 mmol, 60%) was added to the solution, and the mixture was stirred at  $0^\circ\text{C}$  for 1 hr. Allyl bromide (2 mL) was added to it, and stirring was continued at r.t. for 2 hrs. Then,  $\text{H}_2\text{O}$  was added, and the whole was extracted with  $\text{CH}_2\text{Cl}_2$ . The organic layer was dried over  $\text{Na}_2\text{SO}_4$  and evaporated to dryness. Purification of the residue by column chromatography (silica gel,  $\text{CH}_2\text{Cl}_2/\text{hexane} = 2/8$ ) provided **8** (3.31 g, 85% yield).  $^1\text{H}$  NMR (300 MHz,  $\text{CDCl}_3$ ):  $\delta$  4.56 (d,  $J = 6.0$  Hz, 2H), 4.98 (d,  $J = 16.8$  Hz, 1H), 5.14 (d,  $J = 10.2$  Hz, 1H), 5.82-5.93 (m, 1H), 6.44 (d,  $J = 3.0$  Hz, 1H), 6.99 (d,  $J = 3.0$  Hz, 1H), 7.17 (dd,  $J = 1.5, 8.1$  Hz, 1H), 7.43-7.45 (m, 2H);  $^{13}\text{C}$  NMR (75 MHz,  $\text{CDCl}_3$ ):  $\delta$  48.7, 101.6, 112.5, 115.1, 117.4, 122.1, 122.6, 127.4, 128.4, 132.9, 136.8.

### 1-Allyl-6-bromoindoline (**9**)

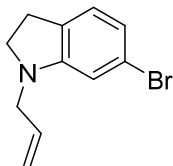

Compound **8** (3.00 g, 12.8 mmol) was dissolved in AcOH (10 mL), and the solution was cooled to  $0^\circ\text{C}$ .  $\text{NaBH}_3\text{CN}$  (995 mg, 15.3 mmol) was added to it, and the solution was stirred at r.t. for 2 hrs. Then, the mixture was neutralized with 2 N NaOH aq. The whole was extracted with  $\text{CH}_2\text{Cl}_2$ , and the organic layer

was dried over Na<sub>2</sub>SO<sub>4</sub> and evaporated to dryness. Purification of the residue by column chromatography (silica gel, CH<sub>2</sub>Cl<sub>2</sub>/hexane = 2/8) provided **9** (2.12g, 70% yield). <sup>1</sup>H NMR (300 MHz, CDCl<sub>3</sub>): δ 2.88 (t, *J* = 9.0 Hz, 2H), 3.36 (t, *J* = 9.0 Hz, 2H), 3.65 (d, *J* = 6.0 Hz, 2H), 5.17-5.29 (m, 2H), 5.80-5.92 (m, 1H), 6.55 (d, *J* = 1.8 Hz, 1H), 6.71 (dd, *J* = 1.8, 7.2 Hz, 1H), 6.87 (d, *J* = 7.2 Hz, 1H); <sup>13</sup>C NMR (75 MHz, CDCl<sub>3</sub>): δ 28.0, 51.4, 53.2, 110.0, 117.5, 119.9, 120.9, 125.3, 129.1, 133.3, 153.5; HRMS (ESI<sup>+</sup>): Calcd for [M+H]<sup>+</sup>, 238.0231; found, 238.0257 (+2.6mmu).

### Compound 10

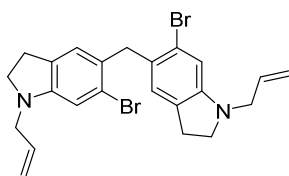

Compound **9** (2.12 g, 8.9 mmol) and 36% formaldehyde in water containing 10% MeOH (222 mg, 26.7 mmol) were dissolved in AcOH (30 mL). The mixture was heated to 60°C, stirred for 15 min, cooled to r.t., and neutralized with 2 N NaOH aq. The whole was extracted with CH<sub>2</sub>Cl<sub>2</sub>, and the organic layer was dried over Na<sub>2</sub>SO<sub>4</sub> and evaporated to dryness. Purification of the residue by column chromatography (silica gel, CH<sub>2</sub>Cl<sub>2</sub>/hexane = 1/9 to 2/8 to 3/7) provided **10** (672 mg, 16% yield). <sup>1</sup>H NMR (300 MHz, CDCl<sub>3</sub>): δ 2.84 (t, *J* = 8.10 Hz, 4H), 3.33 (t, *J* = 8.1 Hz, 4H), 3.66 (d, *J* = 6.0 Hz, 4H), 3.96 (s, 2H), 5.18-5.30 (m, 4H), 5.81-5.94 (m, 2H), 6.67 (s, 2H), 6.71 (s, 2H); <sup>13</sup>C NMR (75 MHz, CDCl<sub>3</sub>): δ 28.2, 40.5, 51.9, 53.4, 110.9, 117.5, 123.0, 126.2, 128.2, 130.1, 133.7, 151.8; HRMS (ESI<sup>+</sup>): Calcd for [M+H]<sup>+</sup>, 489.0364; found, 489.0384 (+2.0 mmu).

### Compound 11

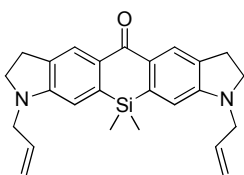

To a flame-dried flask flushed with argon, **10** (660 mg, 1.36 mmol) and anhydrous THF (10 mL) were added. The solution was cooled to -78°C, and 1 M *sec*-BuLi (3.26 mL, 3.26 mmol) was added to it. The mixture was stirred at -78°C for 30 min. Dichlorodimethylsilane (438 mg, 413 μL, 3.40 mmol) was added, and the mixture was warmed to r.t., and then stirred for 2 hrs. The reaction was quenched by addition of 2 N HCl and stirring was continued at r.t. for 15 min. The whole was extracted with CH<sub>2</sub>Cl<sub>2</sub>. The organic layer was dried over Na<sub>2</sub>SO<sub>4</sub> and evaporated to dryness. The residue was dissolved in acetone (30 mL), and the

solution was cooled to r.t. To this solution,  $\text{KMnO}_4$  (537 mg, 3.40 mmol) was added in small portions over a period of 2 hrs with vigorous stirring. The mixture was stirred for another 1 hr at r.t., then diluted with  $\text{CH}_2\text{Cl}_2$ , filtered through a Celite filter and evaporated to dryness. The residue was purified by column chromatography (silica gel,  $\text{CH}_2\text{Cl}_2/\text{hexane} = 1/1$ ) to give **11** (92 mg, 17% yield).  $^1\text{H}$  NMR (300 MHz,  $\text{CDCl}_3$ ):  $\delta$  0.41 (s, 6H), 3.05 (t,  $J = 8.1$  Hz, 4H), 3.49 (t,  $J = 8.1$  Hz, 4H), 3.85 (d,  $J = 6.0$  Hz, 4H), 5.20-5.32 (m, 4H), 5.81-5.94 (m, 2H), 6.52 (s, 2H), 8.21 (s, 2H);  $^{13}\text{C}$  NMR (75 MHz,  $\text{CDCl}_3$ ):  $\delta$  -1.19, 27.8, 50.4, 52.3, 108.1, 117.6, 126.2, 131.5, 132.1, 133.1, 139.9, 153.7, 185.0; HRMS ( $\text{ESI}^+$ ): Calcd for  $[\text{M}+\text{H}]^+$ , 401.2049; found, 401.2092 (+4.3 mmu).

## Compound 12

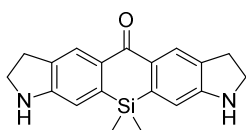

Compound **11** (78 mg, 0.20 mmol) and 3,6-dimethylbarbituric acid (120 mg, 0.80 mmol) were dissolved in  $\text{CH}_2\text{Cl}_2$  (5 mL), and the solution was degassed with argon.  $\text{Pd}(\text{PPh}_3)_4$  (22 mg, 0.02 mmol) was added to it under argon, and the mixture was stirred for 12 hrs at  $40^\circ\text{C}$  and then evaporated to dryness. The residue was purified by column chromatography (silica gel,  $\text{CH}_2\text{Cl}_2$ ) to give **12** (32 mg, 50% yield).  $^1\text{H}$  NMR (300 MHz,  $\text{CDCl}_3$ ):  $\delta$  0.38 (s, 6H), 3.12 (t,  $J = 8.1$  Hz, 4H), 3.67 (t,  $J = 8.1$  Hz, 4H), 4.13 (br, 2H), 6.73 (s, 2H), 8.26 (s, 2H);  $^{13}\text{C}$  NMR (300 MHz,  $\text{CDCl}_3$ ):  $\delta$  -1.3, 29.1, 46.9, 110.8, 126.6, 131.2, 132.5, 139.7, 154.0, 185.4; HRMS ( $\text{ESI}^+$ ): Calcd for  $[\text{M}+\text{H}]^+$ , 321.1423; found, 321.1419 (-0.4 mmu).

## Compound 13

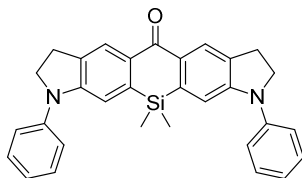

Compound **12** (32 mg, 0.10 mmol),  $\text{Cs}_2\text{CO}_3$  (150 mg, 0.46 mmol) and iodobenzene (60 mg, 0.30 mmol) were dissolved in toluene in a 50 mL Schlenk flask, and the solution was deaerated under argon.  $\text{Pd}(\text{OAc})_2$  (2.0 mg, 0.01 mmol) and BINAP (6.0 mg, 0.01 mmol) were added under argon, and the mixture was heated at  $100^\circ\text{C}$  and stirred overnight. It was then cooled to r.t.,  $\text{H}_2\text{O}$  was added, and the whole was extracted with  $\text{CH}_2\text{Cl}_2$ . The organic layer was dried over  $\text{Na}_2\text{SO}_4$  and evaporated to dryness. Purification of the residue by column chromatography (silica gel,  $\text{CH}_2\text{Cl}_2$ ) provided **13** (20 mg, 42% yield).  $^1\text{H}$  NMR (300 MHz,  $\text{CDCl}_3$ ):  $\delta$  0.40 (s, 6H), 3.22 (t,  $J = 6.0$  Hz, 4H), 4.06 (t,  $J = 6.0$  Hz, 4H), 7.08 (t,  $J = 5.7$  Hz, 1H), 7.21 (s, 2H), 7.31 (d,  $J = 5.7$  Hz, 2H), 7.42 (t,  $J = 5.7$  Hz, 2H), 8.32 (s, 2H);  $^{13}\text{C}$  NMR (300 MHz,  $\text{CDCl}_3$ ):  $\delta$  -1.2, 27.7, 52.4,



110.1, 118.8, 122.4, 126.9, 129.4, 132.9, 133.6, 139.8, 143.1, 149.5, 184.8; HRMS (ESI<sup>+</sup>): Calcd for [M+H]<sup>+</sup>, 473.2049; found, 473.2077 (+2.8 mmu).

#### Compound 14

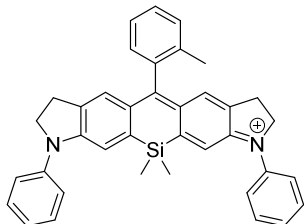

To a flame-dried flask flushed with argon, **13** (20 mg, 0.04 mmol) and anhydrous THF (5.0 mL) were added. The solution was heated to 80°C, and then 1 M *o*-tolyl magnesium bromide (2.0 mL, 2.0 mmol) was added to it. The mixture was stirred for 2 hrs and cooled to r.t. The reaction was quenched by addition of 2 N HCl and stirring was continued at r.t. for 15 min. The whole was extracted with CH<sub>2</sub>Cl<sub>2</sub>. The organic layer was dried over Na<sub>2</sub>SO<sub>4</sub> and evaporated to dryness. Purification of the residue by HPLC (eluent, a 20-min linear gradient, from 20% to 100% solvent B; flow rate, 5.0 ml/min; detection wavelength, 640 nm) provided **14** trifluoroacetic salt (5 mg, 19% yield). <sup>1</sup>H NMR (300 MHz, CD<sub>2</sub>Cl<sub>2</sub>): δ 0.37 (s, 3H), 0.40 (s, 3H), 2.02 (s, 3H), 3.02 (t, *J* = 6.0 Hz, 4H), 4.19 (t, *J* = 5.7 Hz, 4H), 6.87 (s, 2H), 7.06 (d, *J* = 5.7 Hz, 1H), 7.22 (s, 2H), 7.27-7.35 (m, 8H), 7.41 (d, *J* = 5.4 Hz, 1H), 7.46 (t, *J* = 6.0 Hz, 4H); <sup>13</sup>C NMR (300 MHz, CDCl<sub>3</sub>): δ -1.6, -1.3, 19.6, 26.9, 55.0, 116.8, 122.4, 126.3, 127.6, 129.2, 129.3, 130.5, 130.9, 131.3, 135.2, 135.2, 136.1, 139.5, 139.8, 151.6, 154.8, 169.3; HRMS (ESI<sup>+</sup>): Calcd for [M]<sup>+</sup>, 547.2570; found, 547.2532 (-3.8 mmu).

#### 3,6-DiSO<sub>3</sub>H indoline-Si-xanthone (15)

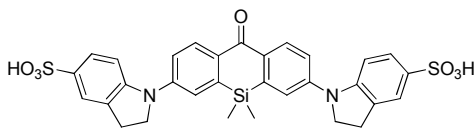

Compound **6** (400 mg, 0.93 mmol) was dissolved in CH<sub>2</sub>Cl<sub>2</sub> (10 mL), and the solution was cooled to 0°C and stirred for 10 min. Chlorosulfuric acid (259 mg, 204 μL, 2.23 mmol) was added dropwise, and the mixture was stirred for 2 hrs at 0°C. The reaction was quenched by addition of H<sub>2</sub>O, and the mixture was evaporated to remove CH<sub>2</sub>Cl<sub>2</sub>. Purification of the solution by HPLC (eluent, a 20-min linear gradient, from 0% to 100% solvent B; flow rate, 5.0 ml/min; detection wavelength, 350 nm) provided **15** (465 mg, 74% yield). <sup>1</sup>H NMR (300 MHz, DMSO): δ 0.54 (s, 6H), 3.22 (t, *J* = 9.0 Hz, 4H), 4.15 (t, *J* = 9.0 Hz, 4H), 7.29 (d, *J* = 8.7 Hz, 2H), 7.45 (dd, *J* = 2.4, 8.7 Hz, 2H), 7.49 (s, 2H), 7.63-7.66 (m, 4H), 8.37 (d, *J* = 8.7 Hz, 2H); <sup>13</sup>C NMR (75 MHz, CDCl<sub>3</sub>): δ. -1.44, 27.1, 51.7, 108.1, 117.5, 119.5, 122.9, 125.1, 130.8, 131.8, 132.1, 140.1, 140.5, 144.9, 145.7, 183.6; HRMS (ESI<sup>-</sup>): Calcd for [M-H]<sup>-</sup>, 630.0951; found, 630.0991 (+4.0 mmu).

### 3,6-Di-*i*-PrSO<sub>3</sub> indoline-Si-xanthone (16)

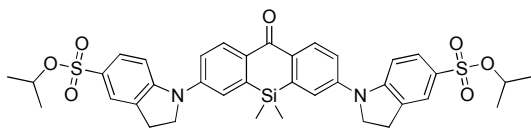

Compound **15** (100 mg, 0.16 mmol) was dissolved in *i*-PrOH (5 mL) and triisopropyl orthoformate (2.0 mL), and the mixture was heated to 55°C and stirred for 4 hrs. The deposited product was filtered off and washed with hexane. Compound **16** (80 mg, 71% yield) was obtained without further purification. <sup>1</sup>H NMR (300 MHz, CDCl<sub>3</sub>): δ 0.54 (s, 6H), 1.31 (d, *J* = 6.0 Hz, 12H), 3.27 (t, *J* = 8.7 Hz, 4H), 4.22 (t, *J* = 8.7 Hz, 4H), 4.76 (sep, *J* = 6.0 Hz, 1H), 7.25 (dd, *J* = 1.5, 8.1 Hz, 2H), 7.41-7.46 (m, 4H), 7.69 (s, 2H), 7.70 (dd, *J* = 2.4, 7.8 Hz, 2H), 8.50 (d, *J* = 8.1 Hz, 2H); <sup>13</sup>C NMR (75 MHz, CDCl<sub>3</sub>): δ -1.30, 22.9, 27.4, 52.4, 108.0, 119.2, 130.8, 124.6, 127.4, 128.8, 131.7, 132.7, 134.8, 140.5, 145.1, 150.1, 184.9; HRMS (ESI<sup>+</sup>): Calcd for [M+H]<sup>+</sup>, 717.2124; found, 717.2169 (+4.5 mmu).

### wsSiNQ780 derivative 1 (17)

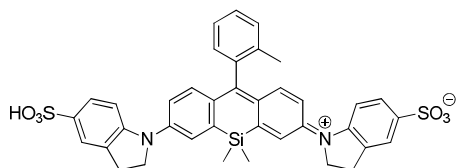

To a flame-dried flask flushed with argon, **16** (12.8 mg, 0.02 mmol) and anhydrous THF (5 mL) were added. The solution was heated to 80°C, and 1 M *o*-tolyl magnesium bromide (300 μL, 0.30 mmol) was added to it. The mixture was stirred for 2 hrs, then cooled to r.t., and the reaction was quenched by addition of 2 N HCl. Stirring was continued at r.t. for 15 min, and then the whole was extracted with CH<sub>2</sub>Cl<sub>2</sub>. The organic layer was dried over Na<sub>2</sub>SO<sub>4</sub> and evaporated to dryness. The residue was dissolved in 2 N HCl (less than 5.0 mL) and CH<sub>3</sub>CN (2.0 mL) and the solution was heated to reflux under argon. It was then cooled to r.t., and purified by HPLC (eluent, a 20-min linear gradient, from 20% to 100% solvent B; flow rate, 5.0 mL/min; detection wavelength, 740 nm) to provide **17** (4.0 mg, 32% yield). <sup>1</sup>H NMR (300 MHz, DMSO): δ 0.67 (s, 3H), 0.70 (s, 3H), 2.05 (s, 3H), 3.25 (t, *J* = 7.50 Hz, 4H), 4.41 (t, *J* = 7.50 Hz, 4H), 7.15 (d, *J* = 9.10 Hz, 2H), 7.27 (d, *J* = 7.50 Hz, 1H), 7.45-7.59 (m, 11H), 7.82 (d, *J* = 2.10 Hz, 2H); HRMS (ESI<sup>-</sup>): Calcd for [M-2H]<sup>-</sup>, 705.1549; found, 705.1586 (+3.7 mmu). The HPLC chromatogram after purification is shown below. Elution was done with a 20-min linear gradient from 80% to 100% solvent B. 1.0 mL/min flow rate. Detection at 740 nm.

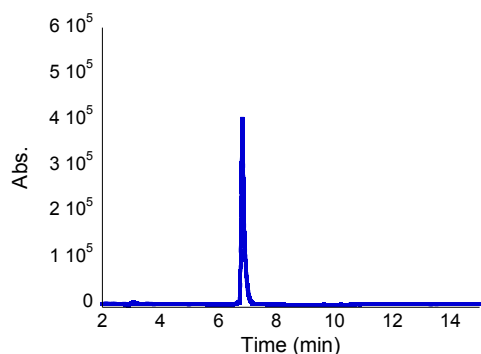

#### wsSiNQ780 derivative 2 (**18**)

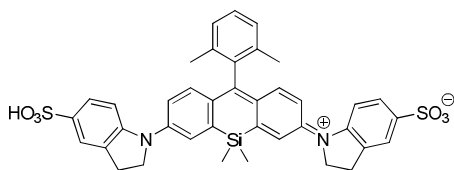

To a flame-dried flask flushed with argon, 2-bromo-*m*-xylene (28 mg, 0.15 mmol) and anhydrous THF (3.0 mL) were added. The solution was cooled to  $-78^{\circ}\text{C}$ , and 1 M *sec*-BuLi (150  $\mu\text{L}$ , 0.15 mmol) was added to it. The mixture was stirred for 30 min, and then a solution of **16** (11 mg, 0.02 mmol) in anhydrous THF (2.0 mL) was added to it at  $-78^{\circ}\text{C}$ , and the whole was allowed to warm to r.t. over 2 hrs. The reaction was quenched by addition of 2 N HCl and the solution was stirred at r.t. for 15 min. The whole was extracted with  $\text{CH}_2\text{Cl}_2$ . The organic layer was dried over  $\text{Na}_2\text{SO}_4$  and evaporated to dryness. The residue was dissolved in 2 N HCl (less than 5.0 mL) and  $\text{CH}_3\text{CN}$  (2.0 mL), and the solution was heated to reflux under argon. It was then cooled to r.t., and purified by HPLC (eluent, a 20-min linear gradient, from 20% to 100% solvent B; flow rate, 5.0 mL/min; detection wavelength, 740 nm) to provide **18** (5 mg, 46% yield).  $^1\text{H}$  NMR (300 MHz, DMSO):  $\delta$  0.70 (s, 6H), 2.05 (s, 6H), 3.33 (br, 4H), 4.43 (t,  $J = 6.6$  Hz, 4H), 7.27-7.43 (m, 7H), 7.62 (d,  $J = 8.7$  Hz, 2H), 7.75-7.84 (m, 6H); HRMS (ESI): Calcd for  $[\text{M}-2\text{H}]^-$ , 719.1706; found, 709.1702 ( $-0.4$  mmu). The HPLC chromatogram after purification is shown below. Elution was done with a 20-min linear gradient from 20% to 100% solvent B. 1.0 mL/min flow rate. Detection at 740 nm.

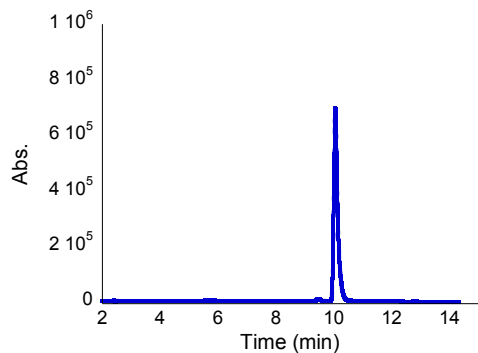

**wsSiNQ780 derivative 3 (19)**

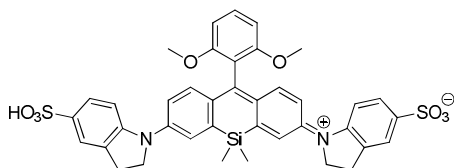

To a flame-dried flask flushed with argon, 2-bromo-1,3-dimethoxybenzene (33 mg, 0.15 mmol) and anhydrous THF (4.0 mL) were added. The solution was cooled to  $-78^{\circ}\text{C}$ , and 1 M *sec*-BuLi (150  $\mu\text{L}$ , 0.15 mmol) was added to it. The mixture was stirred for 30 min, then a solution of **16** (14 mg, 0.02 mmol) in anhydrous THF (2.0 mL) was added at  $-78^{\circ}\text{C}$ , and the whole was warmed to r.t. for 2 hrs. The reaction was quenched by addition of 2 N HCl and stirring was continued at r.t. for 15 min. The whole was extracted with  $\text{CH}_2\text{Cl}_2$ . The organic layer was dried over  $\text{Na}_2\text{SO}_4$  and evaporated to dryness. The residue was dissolved in 2 N HCl (less than 5.0 ml) and  $\text{CH}_3\text{CN}$  (2 mL), and the solution was heated to reflux under argon. It was then cooled to r.t., and purified by HPLC (eluent, a 20-min linear gradient, from 20% to 100% solvent B; flow rate, 5.0 ml/min; detection wavelength, 740 nm) to provide **19** (6 mg, 41% yield).  $^1\text{H}$  NMR (300 MHz, DMSO):  $\delta$  0.66 (s, 6H), 3.24 (t,  $J = 7.5$  Hz, 4H), 3.66 (s, 6H), 4.39 (t,  $J = 7.5$  Hz, 4H), 6.93 (d,  $J = 8.7$  Hz, 2H), 7.30 (d,  $J = 9.6$  Hz, 2H), 7.43 (dd,  $J = 2.1, 9.6$  Hz, 2H), 7.49-7.61 (m, 7H), 7.78 (d,  $J = 2.1$  Hz, 2H); HRMS (ESI): Calcd for  $[\text{M}-2\text{H}]^-$ , 751.1604; found, 751.1567 ( $-3.7$  mmu). The HPLC chromatogram after purification is shown below. Elution was done with a 20-min linear gradient from 20% to 80% solvent B. 1.0 ml/min flow rate. Detection at 740 nm.

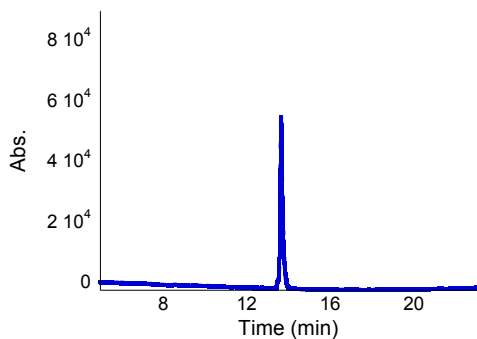

## 2-(4-Bromo-3,5-dimethoxyphenyl)-4,4-dimethyl-4,5-dihydrooxazole (20)

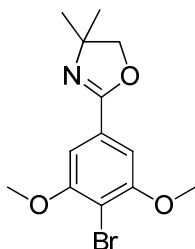

4-Bromo-3,5-dimethoxybenzoic acid (2.09 g, 8.00 mmol) and 2-amino-2-methylpropanol (1.80 g, 20.19 mmol) were added to pyridine (20 mL) and CH<sub>3</sub>CN (20 mL). Then DIEA (6.97 mL) and CCl<sub>4</sub> (3.87 mL) were added, and the solution was cooled to 0°C and stirred for 1 hr. PPh<sub>3</sub> (10.5g, 40.1 mmol) in pyridine (2.0 mL) and CH<sub>3</sub>CN (2.0 mL) were added dropwise, and the mixture was stirred for 12 hrs, then evaporated to dryness. Purification of the residue by column chromatography (silica, CH<sub>2</sub>Cl<sub>2</sub>/hexane = 1/5 to 1/3 to 1/1) provided **20** (500 mg, 20% yield). <sup>1</sup>H NMR (300 MHz, CDCl<sub>3</sub>): δ 1.40 (s, 6H), 3.95 (s, 6H), 4.10 (s, 2H), 7.15 (s, 2H); <sup>13</sup>C NMR (75 MHz, CDCl<sub>3</sub>): δ 28.3, 56.7, 67.9 79.2, 104.4, 128.3, 128.4, 132.0, 156.7, 161.5; HRMS (ESI<sup>+</sup>): Calcd for [M+H]<sup>+</sup>, 314.0392; found, 314.0347 (−4.5 mmu).

## 2',6'-Dimethoxy wsSiNQ780 COOH (21)

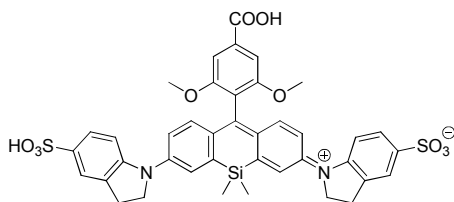

To a flame-dried flask flushed with argon, **20** (65 mg, 0.21 mmol) and anhydrous THF (5.0 mL) were added. The mixture was cooled to −78°C, and 1 M *sec*-BuLi (210 μL) was added to it. The resulting solution was stirred for 15 min, and a solution of **16** (30 mg, 0.04 mmol) in anhydrous THF (5 mL) was added. The mixture was warmed to r.t., stirred for 1 hr, and extracted with CH<sub>2</sub>Cl<sub>2</sub>. The organic layer was dried over Na<sub>2</sub>SO<sub>4</sub> and evaporated to dryness. The residue was dissolved in 6 N HCl (5.0 mL) and CH<sub>3</sub>CN (1.0 mL) and the mixture was heated to 60°C and stirred for 4 hrs. It was then cooled to r.t., and purified by HPLC (eluent, a 20-min linear gradient, from 20% to 100% solvent B; flow rate, 5.0 ml/min; detection wavelength, 740 nm) to provide **21** (20 mg, 60% yield). <sup>1</sup>H NMR (300 MHz, DMSO): δ 0.66 (s, 6H), 3.25 (t, *J* = 7.5 Hz, 4H), 3.73 (s, 6H), 4.40 (t, *J* = 7.5 Hz, 4H), 7.26 (d, *J* = 9.3 Hz, 2H), 7.40-7.58 (m, 10H), 7.78 (d, *J* = 2.1 Hz, 2H, h); HRMS (ESI<sup>−</sup>): Calcd for [M-2H]<sup>−</sup>, 791.1502; found, 791.1528 (+2.6 mmu). The HPLC chromatogram after purification is shown below. Elution was done with a 20-min linear gradient from 1% to 100% solvent B. 1.0 ml/min flow rate. Detection at 650 nm.

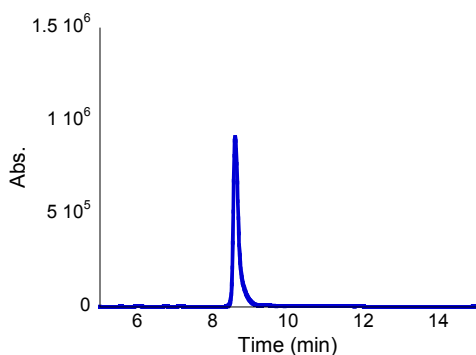

### Compound 22

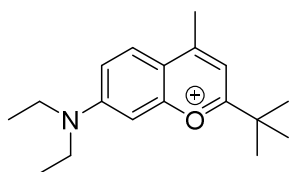

This compound was prepared according to the literature.<sup>SR2</sup> A mixture of *N,N*-diethyl-3-aminophenol (2.60 g, 16.0 mmol) and methyl pivaloyl acetate (4.40g, 28.0 mmol) was heated to 180°C under argon, stirred for 18 hrs, and then cooled to r.t. The resulting solid was roughly purified by column chromatography (silica, AcOEt/hexane = 1:1). The crude compound was dissolved in anhydrous THF (20 mL), and the solution was cooled to 0°C under argon. 3 M MeMgBr (5.5 mL) was added to it, and the mixture was stirred for 2 hrs. The solution was poured into the ice water and tetrafluoroboric acid (3.0 mL) was added to it. Stirring was continued for 1 hr, and then the whole was extracted with CH<sub>2</sub>Cl<sub>2</sub>. The organic layer was dried over Na<sub>2</sub>SO<sub>4</sub> and evaporated to dryness. The residue was added to AcOEt and the precipitate was filtered off and dried under vacuum. Compound **22** tetrafluoroborate salt (1.23 g, 12% yield) was obtained without further purification. <sup>1</sup>H NMR (300 MHz, CDCl<sub>3</sub>): δ 1.36 (t, *J* = 7.2 Hz, 6H), 1.49 (s, 9H), 2.86 (s, 3H), 3.69 (q, *J* = 7.2 Hz, 4H), 6.84 (d, *J* = 2.1 Hz, 1H), 7.15 (s, 1H), 7.40 (dd, *J* = 2.1, 8.7 Hz, 1H), 8.12 (d, *J* = 8.7 Hz, 1H); <sup>13</sup>C NMR (75 MHz, CDCl<sub>3</sub>): δ 12.4, 19.9, 28.2, 37.9, 46.2, 95.3, 111.3, 117.5, 118.5, 129.4, 156.5, 159.7, 164.2, 179.8; HRMS (ESI<sup>+</sup>): Calcd for [M]<sup>+</sup>, 272.2014; found, 272.2015 (+0.1 mmu).

### Modified DY 730 COOH (23)

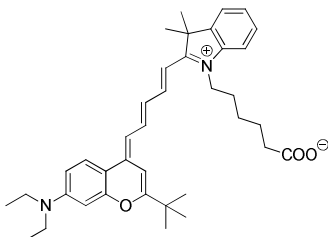

Compound **22** tetrafluoroborate salt (128 mg, 0.36 mmol) and malonaldehyde dianilide hydrochloride

(121 mg, 0.47 mmol) were dissolved in AcOH (2 mL) and Ac<sub>2</sub>O (2 mL). The mixture was heated to 150°C, refluxed under argon for 30 min, and then evaporated to dryness. 1-(5-Carboxypentyl)-2,3,3-trimethyl-3*H*-indol-1-ium bromide (140 mg, 0.47 mmol), EtOH (20 mL) and TEA (5.0 mL) were added to the residue, and the mixture was stirred for 2 hrs, then evaporated to dryness. Purification of the residue by HPLC (eluent, a 20-min linear gradient, from 20% to 100% solvent B; flow rate, 5.0 ml/min; detection wavelength, 680 nm) provided **23** (40 mg, 19% yield). <sup>1</sup>H NMR (300 MHz, CDCl<sub>3</sub>): δ 1.21 (t, *J* = 7.2 Hz, 6H), 1.40-1.50 (m, 14H), 1.58-1.67 (m, 11H), 17.4-1.79 (m, 2H), 2.28 (t, *J* = 7.2 Hz, 2H), 3.51 (q, *J* = 7.5 Hz, 4H), 3.97 (t, *J* = 7.5 Hz, 2H), 6.22 (d, *J* = 13.8 Hz, 1H), 6.59 (d, *J* = 12.6 Hz, 1H), 6.66 (d, *J* = 3.0 Hz, 1H), 6.84 (d, *J* = 14.1 Hz, 1H), 6.94-6.97 (m, 2H), 7.19-7.23 (m, 2H), 7.37 (t, *J* = 6.6 Hz, 1H), 7.45 (d, *J* = 7.2 Hz, 1H), 7.90-8.14 (m, 3H); <sup>13</sup>C NMR (75 MHz, CDCl<sub>3</sub>): δ 12.7, 25.2, 26.8, 27.6, 27.7, 28.2, 34.2, 37.4, 44.7, 45.6, 49.9, 97.5, 100.3, 104.2, 111.4, 11.7, 113.4, 114.0, 123.1, 125.7, 126.9, 129.4, 142.2, 143.3, 149.3, 153.7, 158.0, 171.6, 173.2; HRMS (ESI<sup>+</sup>): Calcd for [M]<sup>+</sup>, 581.3743; found, 581.3697 (−4.6 mmu).

#### ***N*-(35-Amino-3,6,9,12,15,18,21,24,27,30,33-undeca-oxapentatriacontyl)acetamide (24)**

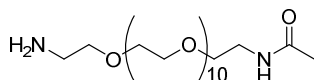

*t*-Butyl(35-amino-3,6,9,12,15,18,21,24,27,30,33-undeca-oxapentatriacontyl)carbamate (1.0 g, 1.55 mmol) was dissolved in Ac<sub>2</sub>O (2.0 mL) and pyridine (2.0 mL). The mixture was stirred for 2 hrs at r.t. and then evaporated to dryness. The residue was dissolved in TFA (2.0 mL). This solution was stirred for 4 hrs and evaporated to dryness to afford crude **24** (1.2 g). HRMS (ESI<sup>+</sup>): Calcd for [M+H]<sup>+</sup>, 587.3755; found, 687.3708 (−4.7 mmu).

#### **Modified DY730 COO-SE (25)**

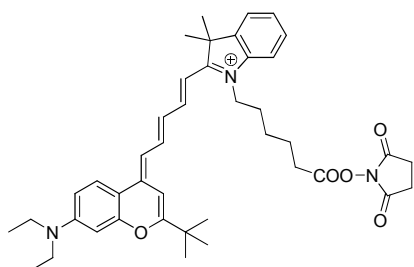

Compound **23** (29 mg, 0.05 mmol) was dissolved in CH<sub>2</sub>Cl<sub>2</sub> (3 mL). WSCD/HCl (95 mg, 0.50 mmol), NHS (58 mg, 0.50 mmol) and DIEA (4 drops) were added to it, and the mixture was stirred for 4 hrs and then evaporated to dryness. The residue was roughly purified by HPLC (eluent, a 20-min linear gradient,

from 20% to 100% solvent B; flow rate, 5.0 ml/min; detection wavelength, 740 nm) to obtain crude **25** trifluoroacetic salt (30 mg).

### 2',6'-Dimethoxy wsSiNQ780 COOH-SE (**26**)

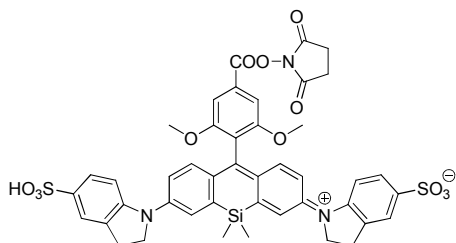

Compound **21** (40 mg, 0.05 mmol) was dissolved in DMF (3.0 mL). WSCD/HCl (95 mg, 0.50 mmol), NHS (58 mg, 0.50 mmol) and DIEA (4 drops) were added to the solution, and the mixture was stirred for 4 hrs and then evaporated to dryness. The residue was roughly purified by HPLC (eluent, a 20-min linear gradient, from 20% to 100% solvent B; flow rate, 5.0 ml/min; detection wavelength, 740 nm) to obtain crude **26** (40 mg).

### Compound **27**

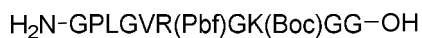

Peptide **27** was synthesized on an automatic peptide synthesizer using standard protocols for fluorenylmethoxycarbonyl (Fmoc) solid-phase synthesis with 2-chlorotrityl resin (0.06 mmol). The peptide was cleaved with  $\text{CH}_2\text{Cl}_2$  containing 1% TFA (2.0 mL) and precipitated by adding water. Crude **27** was filtered off and dried under vacuum. LRMS ( $\text{ESI}^+$ ): 1250  $[\text{M}+\text{H}]^+$ . The peptide was used for the next step without further purification.

### Compound **28**

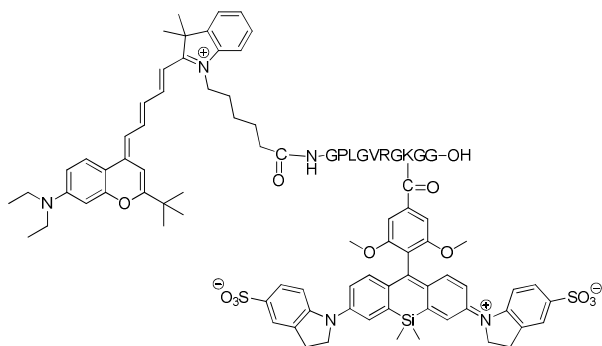

Compound **25** trifluoroacetic salt (20 mg, crude) and peptide **27** (20 mg, crude) were dissolved in DMF (2.0 mL), and then DIEA (4 drops) was added. The mixture was stirred for 4 hrs and evaporated to dryness.



The residue was dissolved in TFA (2.0 mL), triethylsilane (10  $\mu$ L) and H<sub>2</sub>O (10  $\mu$ L), and the mixture was stirred for 2 hrs and then evaporated to dryness. The residue was roughly purified by HPLC. The solution was lyophilized, and the residue was dissolved in DMF (2.0 mL). Compound **26** (5.2 mg, crude) and DIEA (4 drops) were added to the solution, and the mixture was stirred for 4 hrs and then evaporated to dryness. Purification of the residue by HPLC (eluent, a 20-min linear gradient, from 20% to 100% solvent B; flow rate, 5.0 ml/min; detection wavelength, 740 nm) provided **28** (5.0 mg, 7.0% yield). LRMS (ESI<sup>+</sup>): 1120 [M+2H]<sup>2+</sup>.

### MMP probe 1 (**29**)

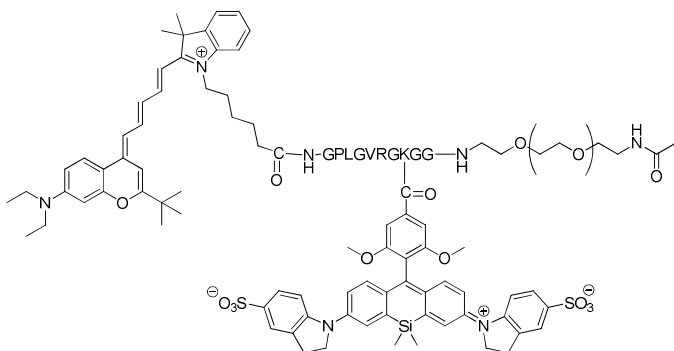

Compound **28** (5.0 mg, 0.03 mmol) was dissolved in DMF (2.0 mL). Compound **24** (15 mg, crude), HATU (38 mg, 0.01 mmol) and DIEA (4 drops) were added, and the mixture was stirred for 6 hrs and then evaporated to dryness. Purification of the residue by HPLC (eluent, a 20-min linear gradient, from 20% to 100% solvent B; flow rate, 5.0 ml/min; detection wavelength, 740 nm) provided **29** (3.2 mg, 51% yield). LRMS (ESI<sup>+</sup>): 1404 [M+2H]<sup>2+</sup>. The HPLC chromatogram after purification is shown below. Elution was done with a 20-min linear gradient from 20% to 100% solvent B. 1.0 ml/min flow rate. Detection at 740 nm.

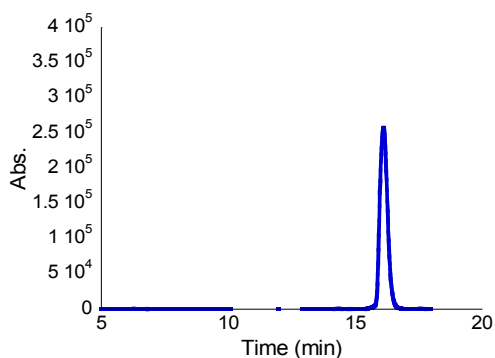

## Compound 30

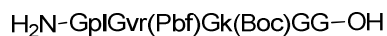

Peptide **30**, which contains D-amino acids, was synthesized on an automatic peptide synthesizer using standard protocols for fluorenylmethoxycarbonyl (Fmoc) solid-phase synthesis with 2-chlorotrityl resin (0.06 mmol reaction site). It was cleaved with 2.0 mL  $\text{CH}_2\text{Cl}_2$  containing 1% TFA. The peptide was precipitated by addition of water. Compound **30** was filtered off and dried under vacuum. LRMS ( $\text{ESI}^+$ ): 1250  $[\text{M}+\text{H}]^+$ . The peptide was used for the next step without further purification. Lower-case letters stand for D-amino acids in the peptide.

## Compound 31

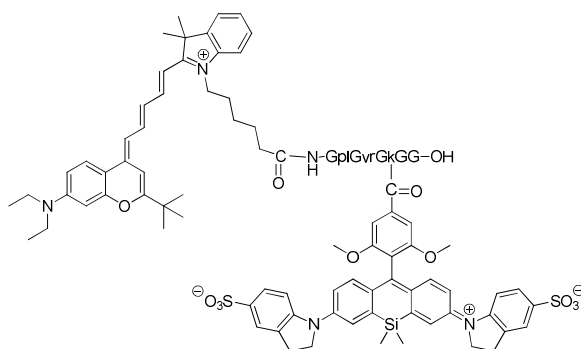

Compound **25** trifluoroacetic salt (20 mg, crude) and peptide **30** (20 mg, crude) were dissolved in DMF (2.0 mL), and DIEA (4 drops) was added to the solution. The mixture was stirred for 4 hrs and evaporated to dryness. The residue was dissolved in TFA (2.0 mL), triethylsilane (10  $\mu\text{L}$ ) and  $\text{H}_2\text{O}$  (10  $\mu\text{L}$ ), and the solution was stirred for 2 hrs and evaporated to dryness. The residue was roughly purified by HPLC. The eluate was lyophilized, and the residue was dissolved in DMF (2.0 mL). Compound **26** (5.2 mg, crude) and DIEA (4 drops) were added, and the mixture was stirred for 4 hrs, and then evaporated to dryness. Purification of the residue by HPLC (eluent, a 20-min linear gradient, from 20% to 100% solvent B; flow rate, 5.0 ml/min; detection wavelength, 740 nm) provided **31** (5.2 mg, 7.0% yield). LRMS ( $\text{ESI}^+$ ): 1120  $[\text{M}+\text{H}+\text{Na}]^{2+}$ . Lower-case letters represent D-amino acids in the peptide.

## MMP probe 2 (32)

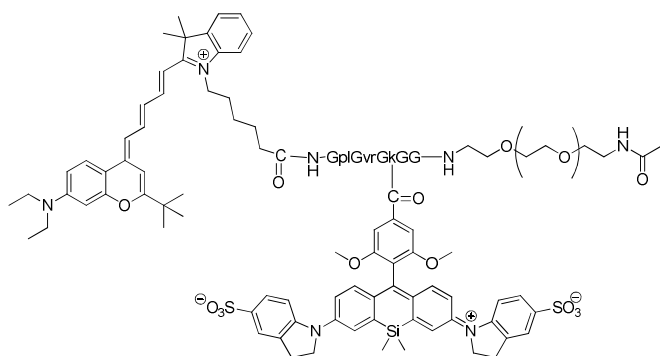

Compound **31** (5.0 mg, 0.03 mmol) was dissolved in DMF (2.0 mL). Compound **24** (15 mg, crude), HATU (38 mg, 0.01 mmol) and DIEA (4 drops) were added to the solution, and the mixture was stirred for 6 hrs, and then evaporated to dryness. Purification of the residue by HPLC (eluent, a 20-min linear gradient, from 20% to 100% solvent B; flow rate, 5.0 ml/min; detection wavelength, 740 nm) provided **32** (5.4 mg, 87% yield). LRMS (ESI<sup>+</sup>): 1404 [M+2H]<sup>2+</sup>. The HPLC chromatogram after purification is shown below. HPLC analysis; eluent, a 20-min linear gradient, from 20% to 100% solvent B; flow rate, 1.0 ml/min; detection wavelength, 740 nm. Lower-case letters represent D-amino acids in the peptide.

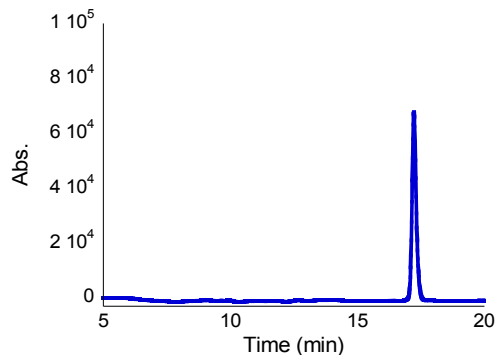

## Compound 33

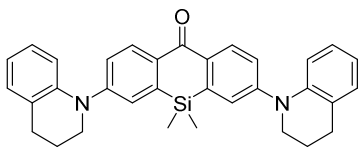

Compound **3** (245 mg, 0.50 mmol), Cs<sub>2</sub>CO<sub>3</sub> (3.25 g, 2.00 mmol) and tetrahydroquinoline (1.33 g, 2.00 mmol) were dissolved in toluene (10-20 ml) in a 50 mL Schlenk flask, and the mixture were deaerated with argon. Pd(OAc)<sub>2</sub> (22 mg, 0.05 mmol) and BINAP (62 mg, 0.05 mmol) were added to it under argon. The

mixture was heated to 100°C and stirred overnight. It was then cooled to r.t. and H<sub>2</sub>O was added. The whole was extracted with CH<sub>2</sub>Cl<sub>2</sub>, and the organic layer was dried over Na<sub>2</sub>SO<sub>4</sub> and evaporated to dryness. Purification of the residue by column chromatography (silica gel, CH<sub>2</sub>Cl<sub>2</sub>/hexane = 1/1) provided **33** (150 mg, 60% yield). <sup>1</sup>H NMR (300 MHz, CDCl<sub>3</sub>): δ 0.43 (s, 6H), 2.06 (qt, *J* = 6.0 Hz, 4H), 2.82 (t, *J* = 6.0 Hz, 4H), 3.74 (t, *J* = 6.0 Hz, 4H), 6.87 (t, *J* = 7.5 Hz, 2H), 7.04 (dt, *J* = 1.5, 8.7 Hz, 2H), 7.12 (d, *J* = 7.5 Hz, 2H), 7.28 (d, *J* = 8.1 Hz, 2H), 7.34 (dd, *J* = 3.0, 9.0 Hz, 2H), 7.41 (d, *J* = 2.4 Hz, 2H), 8.39 (d, *J* = 8.7 Hz, 2H); <sup>13</sup>C NMR (75 MHz, CDCl<sub>3</sub>): δ -1.43, 23.6, 27.4, 49.1, 118.7, 120.9, 121.8, 123.6, 126.3, 128.4, 129.3, 131.3, 134.1, 140.2, 142.1, 150.4, 185.3; HRMS (ESI<sup>+</sup>): Calcd for [M+H]<sup>+</sup>, 501.2362; found, 501.2412 (+5.0 mmu).

### Compound 34

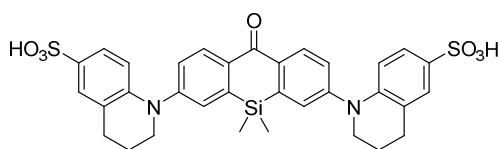

Compound **33** (50 mg, 0.10 mmol) was dissolved in CH<sub>2</sub>Cl<sub>2</sub> (10 mL), and the solution was cooled to 0 °C and stirred for 10 min. Chlorosulfuric acid (182 μL) was added dropwise, and the mixture was stirred for 2 hrs at 0°C. The reaction was quenched by addition of H<sub>2</sub>O, and the whole was evaporated to remove CH<sub>2</sub>Cl<sub>2</sub>. Purification of the residual solution by HPLC (eluent, a 20-min linear gradient, from 0% to 100% solvent B; flow rate, 5.0 ml/min; detection wavelength, 350 nm) provided **34** (78 mg, quant). <sup>1</sup>H NMR (300 MHz, DMSO): δ 0.46 (s, 6H), 1.97 (q, *J* = 6.0 Hz, 4H), 2.76 (t, *J* = 6.0 Hz, 4H), 3.74 (t, *J* = 6.0 Hz, 4H), 7.03 (d, *J* = 8.1 Hz, 2H), 7.27 (d, *J* = 8.1 Hz, 2H), 7.38-7.42 (m, 4H), 7.55 (d, *J* = 2.1 Hz, 2H), 8.21 (d, *J* = 8.7 Hz, 2H); <sup>13</sup>C NMR (75 MHz, DMSO): δ -1.6, 23.1, 26.9, 38.7, 38.9, 39.2, 39.5, 39.8, 40.1, 40.3, 48.8, 117.2, 121.5, 123.7, 123.8, 126.7, 127.4, 130.5, 133.2, 140.3, 141.7, 149.9, 183.8; HRMS (ESI<sup>-</sup>): Calcd for [M-H]<sup>-</sup>, 658.1264; found, 658.1243 (-2.1 mmu).

### 3,6-Di-*i*-PrSO<sub>3</sub> tetrahydroquinoline-Si-xanthone (**35**)

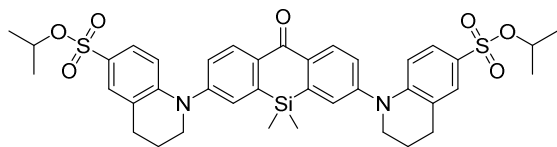

Compound **34** (66 mg, 0.10 mmol) was dissolved in CH<sub>2</sub>Cl<sub>2</sub> (3.0 mL) and DMF (1.0 mL), and the mixture was cooled to 0°C under argon. Oxalyl chloride (85 μL, 0.50 mmol) was added to it, and the mixture was stirred for 2 hrs, and then evaporated to dryness. The residue was dissolved in CH<sub>2</sub>Cl<sub>2</sub> under argon. Pyridine (15 mL) and *i*-PrOH (5.0 mL) were added to it, and the mixture was stirred at r.t. for 2 hrs, then

### Compound 36

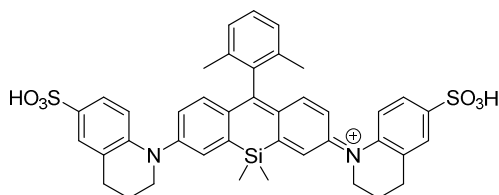

The chromatogram displays a single, sharp, and prominent peak at a retention time of approximately 6.8 minutes. The y-axis, labeled 'Abs.', ranges from 0 to  $2 \times 10^5$  with major ticks at  $0$ ,  $5 \times 10^4$ ,  $1 \times 10^5$ ,  $1.5 \times 10^5$ , and  $2 \times 10^5$ . The x-axis, labeled 'Time (min)', ranges from 6 to 14 with major ticks at 6, 8, 10, 12, and 14. The peak reaches a maximum absorbance of approximately  $1.5 \times 10^5$ . The baseline is stable and near zero throughout the rest of the run.

## Compound 37

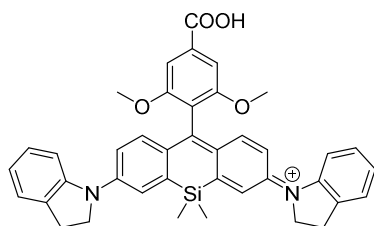

To a flame-dried flask flushed with argon, **20** (100 mg, 0.32 mmol) and anhydrous THF (10 mL) were added. The mixture was cooled to  $-78^{\circ}\text{C}$ , and 1 M *sec*-BuLi (310  $\mu\text{L}$ ) was added to it. The mixture was stirred for 15 min, and then a solution of **6** (30 mg, 0.06 mmol) in anhydrous THF (3.0 mL) was added. The whole was warmed to r.t., stirred for 1 hr, and then extracted with  $\text{CH}_2\text{Cl}_2$ . The organic layer was dried over  $\text{Na}_2\text{SO}_4$  and evaporated to dryness. The residue was dissolved in 6 N HCl (5.0 mL) and  $\text{CH}_3\text{CN}$  (1.0 mL) and the mixture was heated to  $60^{\circ}\text{C}$  and then stirred for 4 hrs. Purification of the solution by HPLC (eluent, a 20-min linear gradient, from 40% to 100% solvent B; flow rate, 5.0 mL/min; detection wavelength, 740 nm) provided **37** (25 mg, 65% yield).  $^1\text{H}$  NMR (300 MHz, acetone- $d_6$ ):  $\delta$  0.70 (s, 6H), 3.35 (t,  $J = 7.2$  Hz, 4H), 3.81 (s, 6H), 4.47 (t,  $J = 7.2$  Hz, 4H), 7.16 (t,  $J = 7.2$  Hz, 2H), 7.32 (t,  $J = 7.2$  Hz, 2H), 7.40-7.48 (m, 6H), 7.52 (s, 2H), 7.68 (d,  $J = 8.1$  Hz, 2H), 7.93 (s, 2H); HRMS (ESI<sup>+</sup>): Calcd for  $[\text{M}+\text{H}]^+$ , 637.2523; found, 637.2529 (+0.6 mmu). The HPLC chromatogram after purification is shown below. HPLC analysis; eluent, a 20-min linear gradient, from 40% to 100% solvent B; flow rate, 1.0 mL/min; detection wavelength, 740 nm.

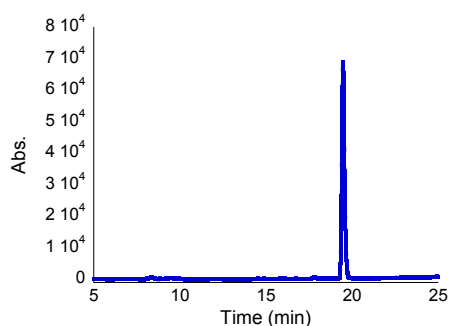

## ICG-wsSiNQ780 (38)

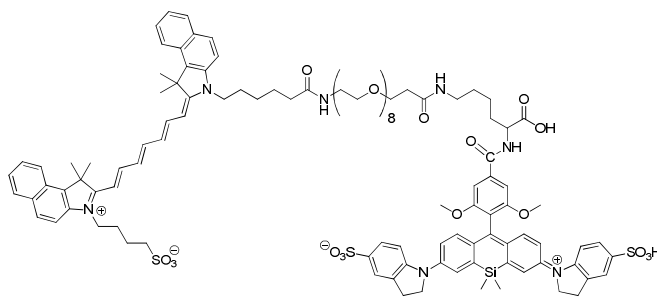

Compound **26** (5.2 mg, crude) and *N*<sup>α</sup>-Boc-L-lysine (24.6 mg, 0.10 mmol) were dissolved in DMF (1

mL), and DIEA (30  $\mu$ L) was added to the solution. The mixture was stirred for 14 hrs, then evaporated to dryness and the residue was dissolved in  $\text{CH}_3\text{CN}$  (1 mL). The solution was cooled to  $0^\circ\text{C}$ , and TFA (1 mL) was added to it. The mixture was stirred for 30 min, then evaporated to dryness and the residue was roughly purified by HPLC (eluent, a 20-min linear gradient, from 20% to 100% solvent B; flow rate, 5.0 ml/min; detection wavelength, 740 nm). The crude product was dissolved in DMF (500  $\mu$ L), and ICG-EG8-Sulfo-OSu (5 mg, 0.04 mmol)<sup>SR3</sup> and DIEA (30  $\mu$ L) were added to the solution. The mixture was stirred for 18 hrs and then evaporated to dryness. Purification of the residue by HPLC (eluent, a 20-min linear gradient, from 20% to 100% solvent B; flow rate, 5.0 ml/min; detection wavelength, 740 nm) provided **38** (0.3 mg, 2.6% yield). HRMS (ESI): Calcd for  $[\text{M}-2\text{H}]^{2-}$ , 2057.8177; found, 2057.8128 ( $-4.9$  mmu). The HPLC chromatogram after purification is shown below. Elution was done with a 20-min linear gradient from 20% to 100% solvent B. 1.0 ml/min flow rate. Detection at 740 nm.

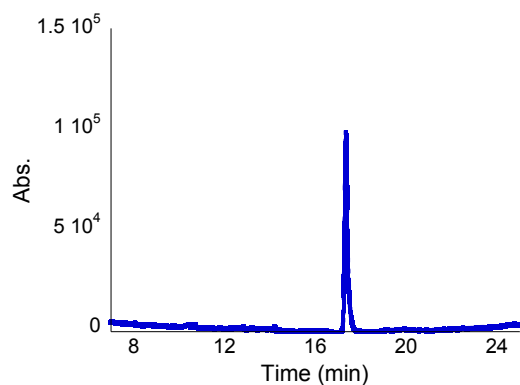

**Table S1.** Photophysical properties of SiNQ660 (**5**).

|              | Abs <sub>max</sub> (nm) | $\Phi_{\text{FL}}^a$ |
|--------------|-------------------------|----------------------|
| MeOH         | 660                     | n.d.                 |
| Acetonitrile | 660                     | n.d.                 |
| DMSO         | 672                     | n.d.                 |
| Chloroform   | 663                     | n.d.                 |

<sup>a</sup> For determination of the fluorescence quantum yield ( $\Phi_{\text{FL}}$ ), Cy5.5 in PBS at pH 7.4 ( $\Phi_{\text{FL}} = 0.23$ ) was used as a fluorescence standard.<sup>SR4</sup>

**Table S2.** Photophysical properties of SiNQ780 (**7**).

|            | Abs <sub>max</sub> (nm) | $\Phi_{\text{FL}}^a$ |
|------------|-------------------------|----------------------|
| MeOH       | 779                     | n.d.                 |
| DMF        | 790                     | n.d.                 |
| Chloroform | 790                     | n.d.                 |

<sup>a</sup> For determination of the fluorescence quantum yield ( $\Phi_{\text{FL}}$ ), ICG in DMSO ( $\Phi_{\text{FL}} = 0.13$ ) was used as a fluorescence standard.<sup>SR5</sup>

**Table S3.** Photophysical properties of compound **14**.

|      | Abs <sub>max</sub> (nm) | $\Phi_{\text{FL}}^a$ |
|------|-------------------------|----------------------|
| MeOH | 731                     | 0.08                 |

<sup>a</sup> For determination of the fluorescence quantum yield ( $\Phi_{\text{FL}}$ ), ICG in DMSO ( $\Phi_{\text{FL}} = 0.13$ ) was used as a fluorescence standard.<sup>SR5</sup>

**Table S4.** Photophysical property of wsSiNQ780 derivative **2** and **36** in PBS.

|                               | Abs <sub>max</sub> (nm) |
|-------------------------------|-------------------------|
| wsSiNQ780 derivative <b>2</b> | 763                     |
| <b>36</b>                     | 732                     |



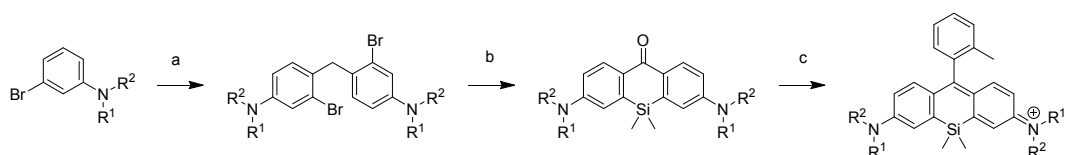

**Scheme S1.** a) HCHO, acetic acid; b) i) *sec*-BuLi, (CH<sub>3</sub>)<sub>2</sub>SiCl<sub>2</sub>, THF, ii) KMnO<sub>4</sub>, acetone; c) *o*-tolylmagnesium bromide, THF.

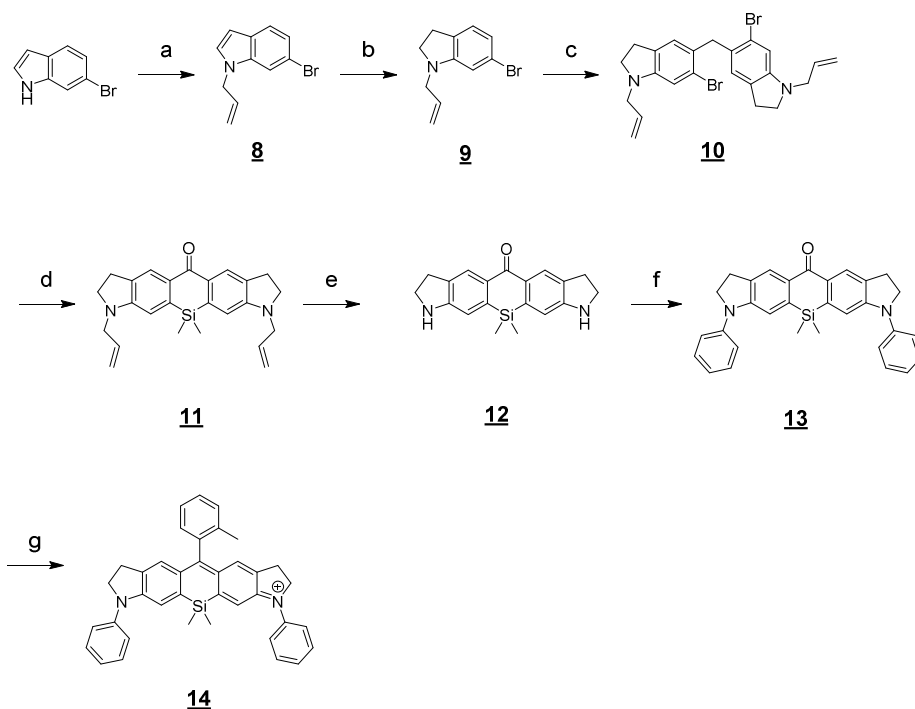

**Scheme S2.** (a) NaH, allyl bromide, DMF, 0 °C, 85%; (b) NaBH<sub>3</sub>CN, CH<sub>3</sub>COOH, 0°C, 70%; (c) formaldehyde, CH<sub>3</sub>COOH, 80°C, 16%; (d) i) *sec*-BuLi, dichlorodimethylsilane, THF, -78°C, ii) KMnO<sub>4</sub>, acetone, 17%; (e) Pd(PPh<sub>3</sub>)<sub>4</sub>, 1,3-dimethylbarbituric acid, CH<sub>2</sub>Cl<sub>2</sub>, 40°C, 50%; (f) iodobenzene, Pd(OAc)<sub>2</sub>, BINAP, Cs<sub>2</sub>CO<sub>3</sub>, toluene, 100°C, 42%; (g) i) *o*-tolylmagnesium bromide, THF, 80°C, ii) 2N HCl aq., 18%.

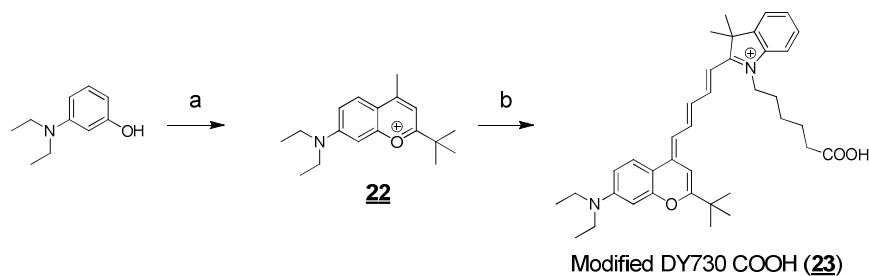

**Scheme S3.** a) i) Methyl 4,4-dimethyl-3-oxovalerate, neat, 180°C, ii) MeMgBr, THF, iii) tetrafluoroboric acid, H<sub>2</sub>O, 22%; b) i) malonaldehyde dianilide hydrochloride, AcOH, Ac<sub>2</sub>O, reflux, ii) 1-(5-carboxypentyl)-2,3,3-trimethyl-3*H*-indolium bromide, TEA, EtOH, 19%.

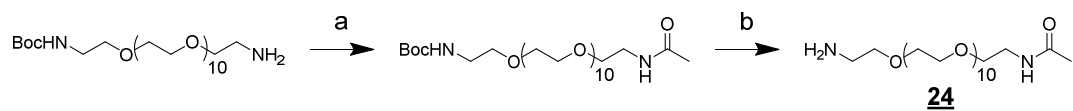

**Scheme S4.** a) Ac<sub>2</sub>O, pyridine, crude; b) TFA, CH<sub>2</sub>Cl<sub>2</sub>, crude.

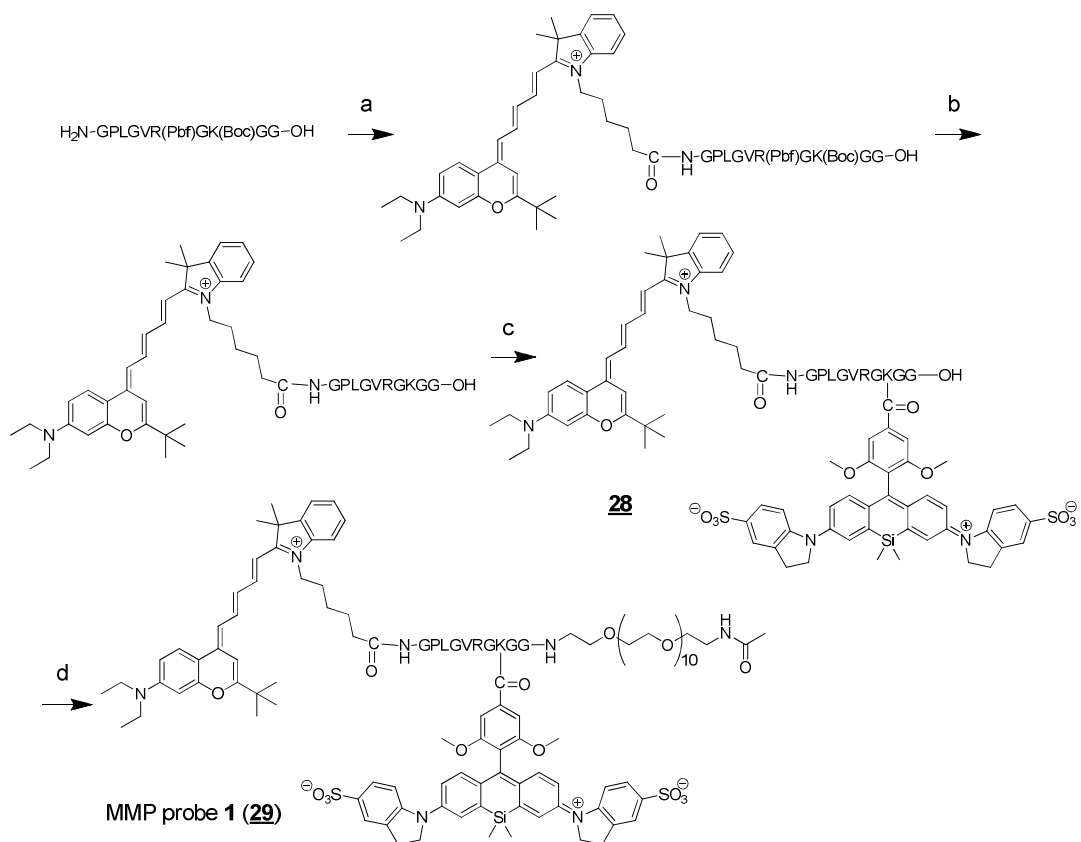

**Scheme S5.** a) **25**, DIEA, DMF, crude; b) TFA, triethylsilane, H<sub>2</sub>O, crude; c) **26**, DIEA, DMF, 7.0% (in 3 steps); d) **24**, HATU, DIEA, DMF, 51%.

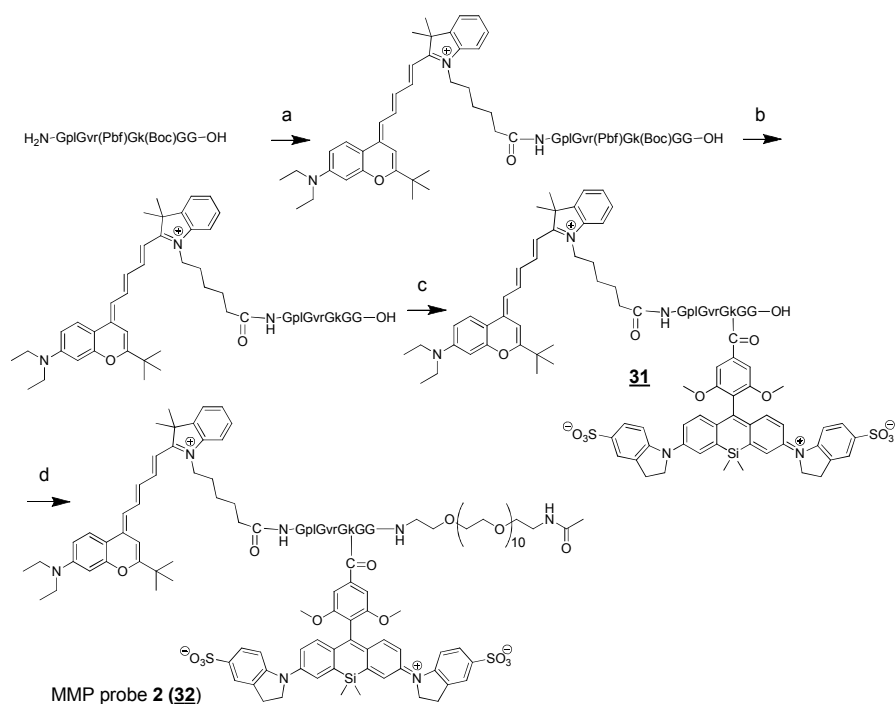

**Scheme S6.** a) **25**, DIEA, DMF, crude; b) TFA, triethylsilane, H<sub>2</sub>O, crude; c) **26**, DIEA, DMF, 7.0% (in 3 steps); d) **24**, HATU, DIEA, DMF, 87%. Lower-case letters represent D-amino acids in the peptide.

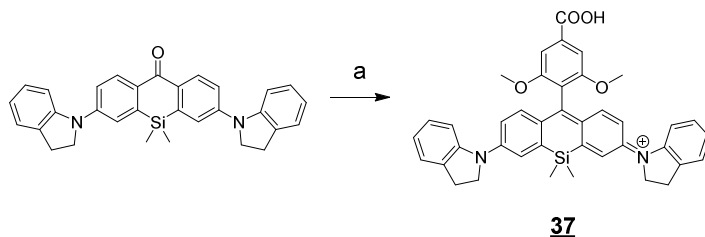

**Scheme S7.** a) i) **20**, *sec*-BuLi, THF, 60°C, ii) 2 N HCl aq., acetone, reflux, 2 days, 65%.

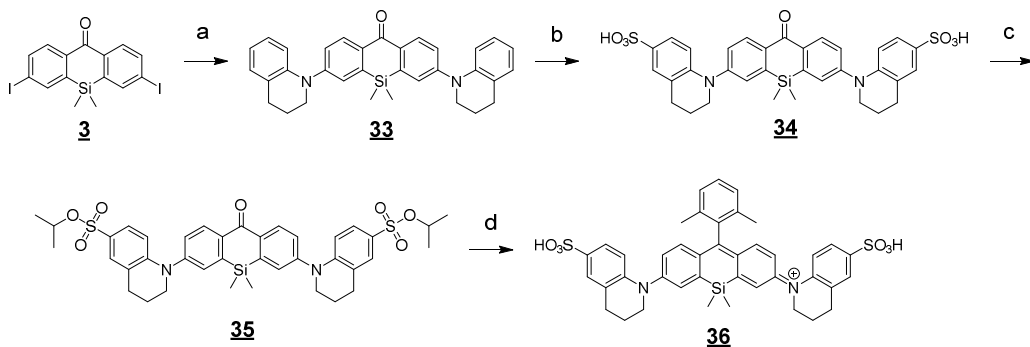

**Scheme S8.** a) 1,2,3,4-tetrahydroquinoline, Pd(OAc)<sub>2</sub>, BINAP, Cs<sub>2</sub>CO<sub>3</sub>, toluene, 80°C, 60%; b) ClSO<sub>3</sub>H, CH<sub>2</sub>Cl<sub>2</sub>, quant; c) i) oxalyl chloride, DMF, CH<sub>2</sub>Cl<sub>2</sub>, ii) isopropanol, pyridine, 35%; d) i) 2-bromo-*m*-xylene, *sec*-BuLi, THF, -78°C, ii) 2 N HCl aq., reflux, 54%.

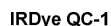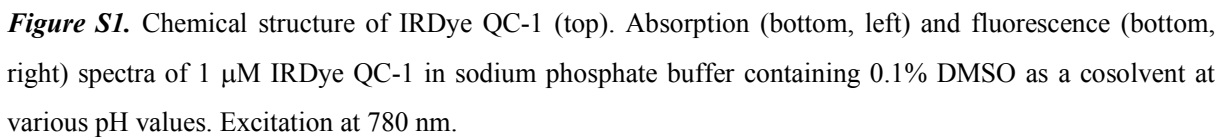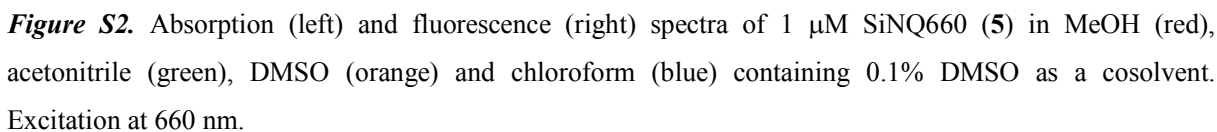

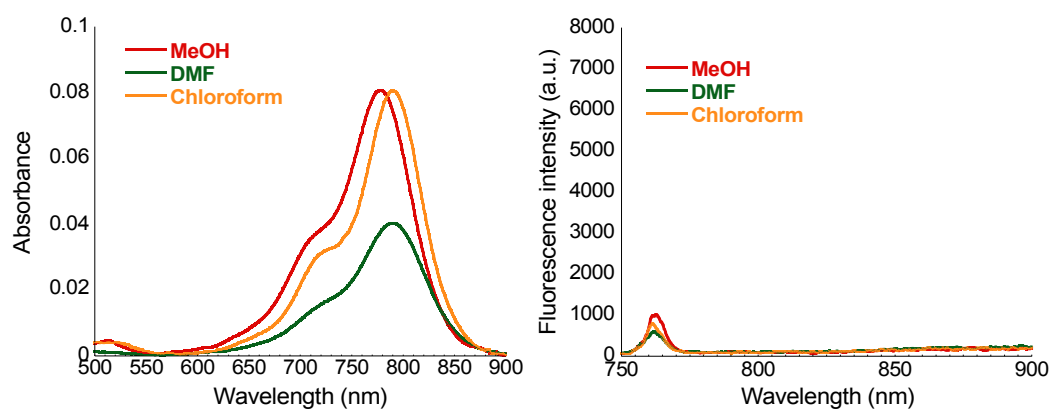

**Figure S3.** Absorption (left) and fluorescence (right) spectra of 1  $\mu$ M SiNQ780 (**7**) in MeOH (red), DMF (green) and chloroform (orange) containing 0.1% DMSO as a cosolvent. Excitation at 760 nm.

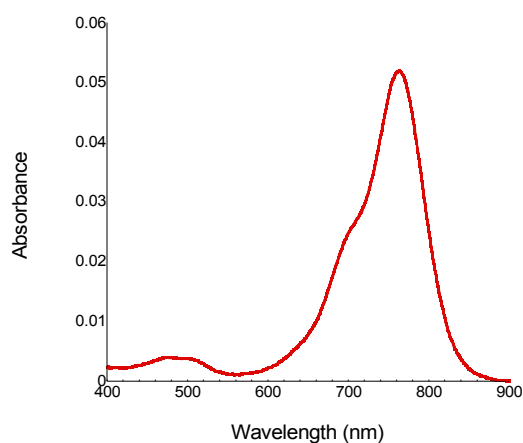

**Figure S4.** Absorption spectrum of wsSiNQ780 derivative **1** (1  $\mu$ M) in PBS (pH 7.4) containing 0.1% DMSO as a cosolvent.

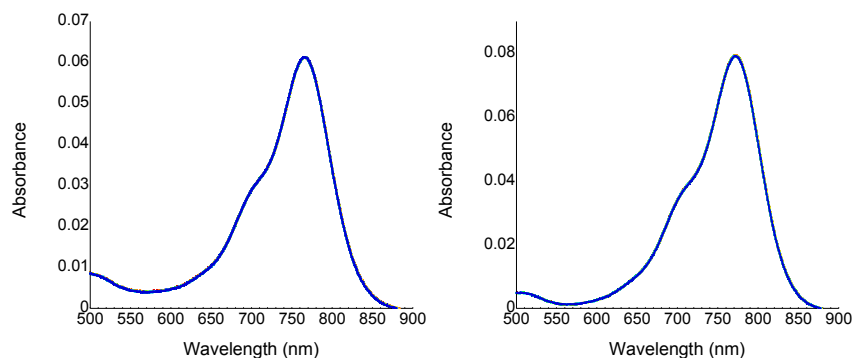

**Figure S5.** Absorption spectra of wsSiNQ780 derivative **2** (left) and **3** (right) in PBS containing 0.1% DMSO as a cosolvent for 1 hr. As shown in the figure, both compounds showed almost no absorption spectral change.

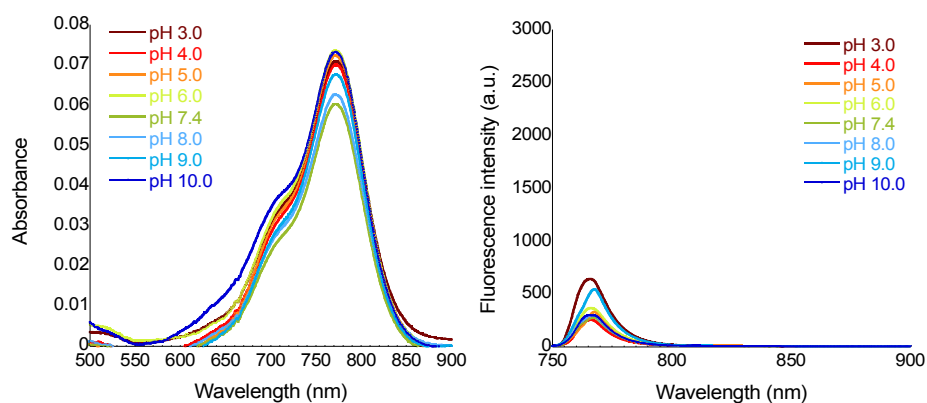

**Figure S6.** Absorption (left) and fluorescence (right) spectra of 1  $\mu\text{M}$  wsSiNQ780 derivative **3** in sodium phosphate buffer at various pH values containing 0.1% DMSO as a cosolvent. Excitation at 760 nm.

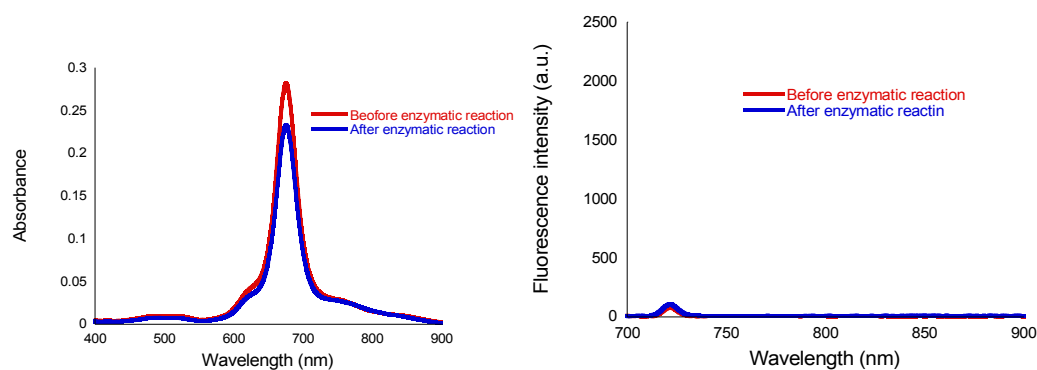

**Figure S7.** Absorption (left) and fluorescence (right) spectra of MMP probe **2** (final 1  $\mu\text{M}$ ) in TCN buffer containing 0.1% DMSO as a cosolvent. MT1-MMP catalytic domain (5  $\mu\text{g}$ ) was added and incubated for 2 hrs. Ex = 720 nm.

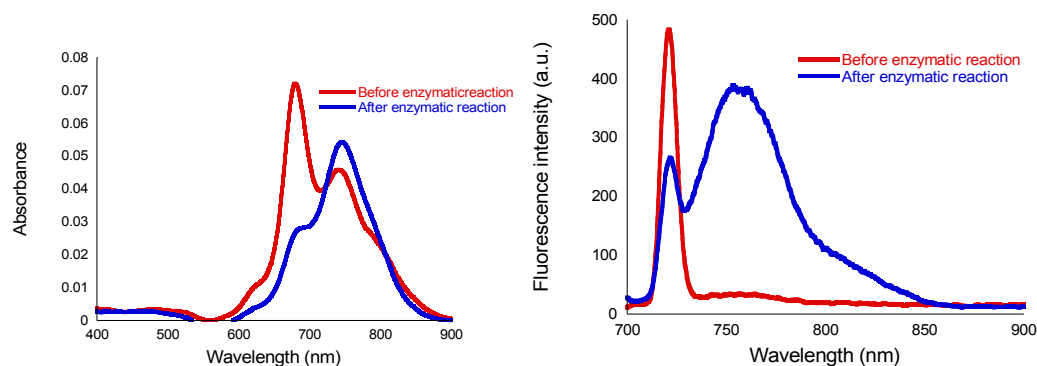

**Figure S8.** Absorption (left) and fluorescence (right) spectra of MMP probe **1** (final 1  $\mu\text{M}$ ) in TCNB buffer containing 0.1% DMSO as a cosolvent. MMP-9 catalytic domain (5  $\mu\text{g}$ ) was added to the solution and incubated for 2 hrs. Ex = 720 nm.

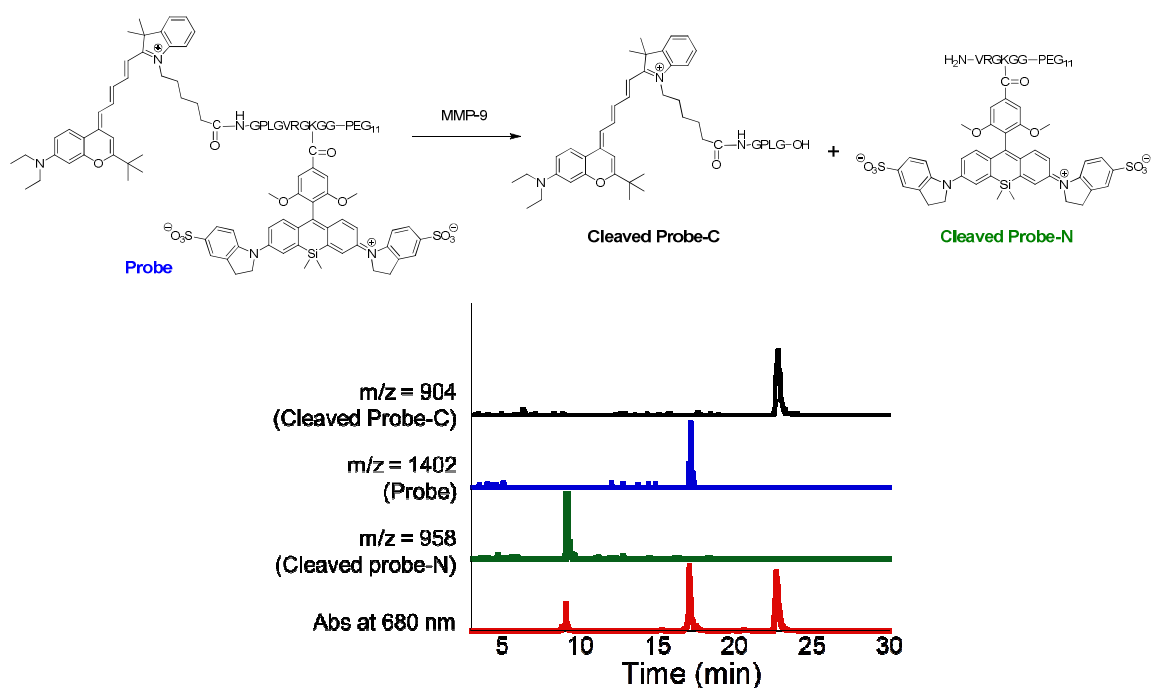

**Figure S9.** LC-MS chromatograms (lower) of the reaction mixture of MMP probe **1** incubated with MMP-9 for 18 hrs. The reaction scheme of MMP probe **1** with MMP-9 (upper) is also shown. The mass signals of Probe, Cleaved Probe-C and Cleaved Probe-N shown in the figure are  $m/z = 1402$ ,  $904$  and  $958$ , respectively.

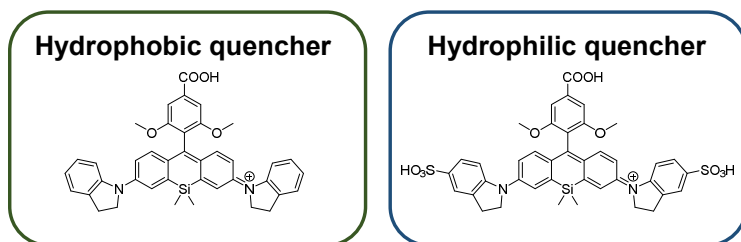

**Figure S10.** Chemical structures of hydrophobic (left) and hydrophilic (right) SiNQ780 derivatives, which can be selected for use as required.

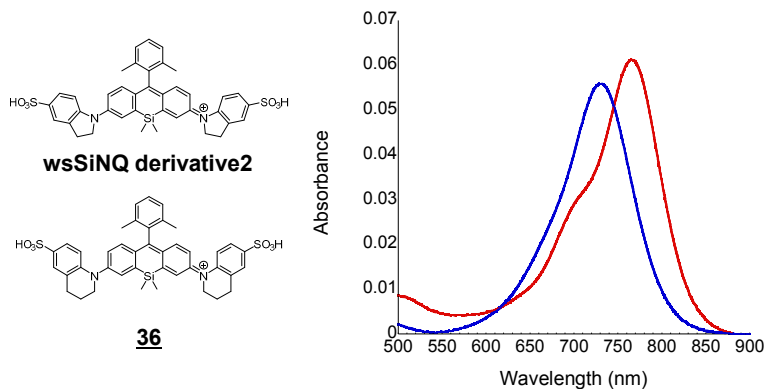

**Figure S11.** Absorption spectra of wsSiNQ780 derivative **2** (red) and **36** (blue) in PBS containing 0.1% DMSO as a cosolvent.

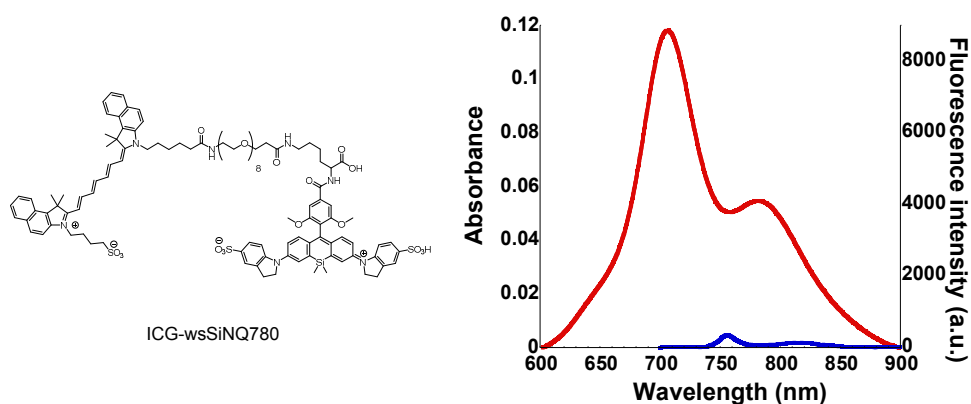

**Figure S12.** Chemical structure of ICG-wsSiNQ780 and its absorption (red) and fluorescence (blue) spectra in PBS containing 0.1% DMSO as a cosolvent. Excitation wavelength is 750 nm. ICG-wsSiNQ780 is almost non-fluorescent ( $\Phi_{\text{FL}} = 0.001$ ). The fluorescence of ICG ( $\Phi_{\text{FL}} = 0.13$  in DMSO) was highly quenched by wsSiNQ780.

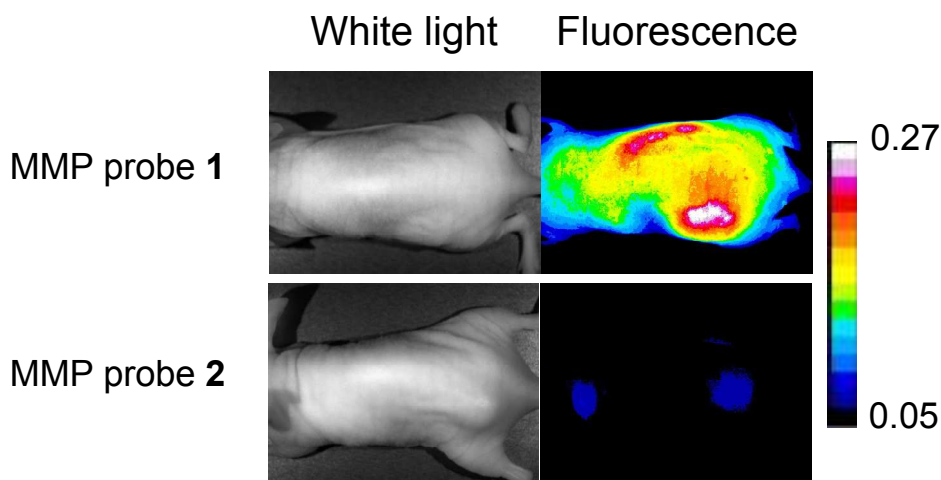

**Figure S13.** Fluorescence images of an HT-1080 tumor-bearing nude mouse injected with MMP probe **1** or **2** (100  $\mu\text{M}$  in 100  $\mu\text{L}$  PBS containing 1% DMSO as a cosolvent) via the tail vein.

#### (Supporting References)

- SR1 Egawa, T.; Koide, Y.; Hanaoka, K.; Komatsu, T.; Terai, T.; Nagano, T. *Chem. Commun.* **2011**, 47, 4162-4164.
- SR2 Cooper, M. E., WO 2008015415 A2, **2008**.
- SR3 Sano, K.; Nakajima, T.; Miyazaki, K.; Ohuchi, Y.; Ikegami, T.; Choyke, P. L.; Kobayashi, H. *Bioconjugate Chem.* **2013**, 24, 811-816.
- SR4 Mujumdar, S. R.; Mujumdar, R. B.; Grant, C. M.; Waggoner, A. S. *Bioconjugate Chem.* **1996**, 7,



356-362.

SR5 Benson, R. C.; Kues, H. A. *J. Chem. Eng. Data* **1977**, 22, 379-383.
